1 **Extracellular vesicle molecular signatures characterize metastatic dynamicity**  
2 **in ovarian cancer**

3 **Amber Gonda<sup>1</sup>, Nanxia Zhao<sup>2</sup>, Jay V. Shah<sup>1</sup>, Jake N. Siebert<sup>1,3</sup>, Srujanesh Gunda<sup>4</sup>, Berk Inan<sup>4</sup>,**  
4 **Mijung Kwon<sup>5</sup>, Steven K. Libutti<sup>5</sup>, Prabhas V. Moghe<sup>1,2</sup>, Nicola L. Francis<sup>1\*</sup>, Vidya Ganapathy<sup>1\*</sup>**

5 <sup>1</sup>Department of Biomedical Engineering, Rutgers University, Piscataway, NJ, USA

6 <sup>2</sup>Department of Chemical and Biochemical Engineering, Rutgers University, Piscataway, NJ, USA

7 <sup>3</sup>Rutgers-Robert Wood Johnson Medical School, New Brunswick, NJ, USA

8 <sup>4</sup>School of Environmental and Biological Sciences, New Brunswick, NJ, USA

9 <sup>5</sup> Rutgers Cancer Institute of New Jersey, New Brunswick, NJ, USA

10

11 **\* Correspondence:**

12 Vidya Ganapathy

13 Assistant Research Professor

14 [vg180@soe.rutgers.edu](mailto:vg180@soe.rutgers.edu)

15

16 Nicola L. Francis

17 Research Associate

18 [nicola.francis@rutgers.edu](mailto:nicola.francis@rutgers.edu)

19

20 **Keywords:** extracellular vesicle, exosome, gene signatures, metastasis, ovarian cancer

21 **Abstract**

22 Late-stage diagnosis of ovarian cancer drastically lowers 5-year survival rate from 90% to 30%. Early  
23 screening tools that use non-invasive sampling methods combined with high specificity and sensitivity  
24 can significantly increase survival. Emerging research employing blood-based screening tools have  
25 shown promise in non-invasive detection of cancer. Our findings in this study show the potential of a  
26 small extracellular vesicle (sEV)-derived signature as a non-invasive longitudinal screening tool in  
27 ovarian cancer. We identified a 7-gene panel in these sEVs that overlapped with an established tissue-  
28 derived metastatic ovarian carcinoma signature. We found the 7-gene panel to be differentially expressed  
29 with tumor development and metastatic spread. While there were quantifiable changes in genes from the  
30 7-gene panel in plasma-derived sEVs from ovarian cancer patients, we were unable to establish a  
31 definitive signature due to low sample number. The most notable finding was a significant change in the  
32 ascites-derived sEV gene signature that overlapped with that of the plasma-derived sEV signature at  
33 varying stages of disease progression. Taken together our findings show that differential expression of  
34 metastatic genes derived from circulating sEVs present a minimally invasive screening tool for ovarian  
35 cancer detection and longitudinal monitoring of molecular changes associated with progression and  
36 metastatic spread.

37  
38  
39

40 **Abbreviations**

41 *ACTB*, actin-beta; *AEBP1*, AE Binding Protein; ANOVA, analysis of variance; *COL5A1*, collagen type V  
42 alpha 1 chain; *COL11A1*, collagen type XI alpha 1 chain; ECM, extracellular matrix; EMT, epithelial-  
43 mesenchymal transition; EV, extracellular vesicle; FDA, United States Food and Drug Administration;  
44 *LOX*, lysyl oxidase; *NECTIN4*, nectin cell adhesion molecule 4; NTA, nanoparticle tracking analysis;  
45 *POSTN*, periostin; PBS, phosphate-buffered saline; RFP, red fluorescence protein; RT-PCR, real-time  
46 polymerase chain reaction; sEV, small extracellular vesicle; *SNAIL1*, snail family transcriptional repressor  
47 1; TCGA, the Cancer Genome Atlas; *THBS1*, thrombospondin 1; *TIMP3*, tissue inhibitor of  
48 metalloproteinase 3; TME, tumor microenvironment; TNM, tumor-node-metastasis staging

49  
50  
51

## 52 **Introduction**

53 Ovarian cancer, is the fifth most deadly cancer in females due to its diagnosis at advanced stages of the  
54 disease (1, 2). Statistics show a 5-year survival rate of 90% when detected early (2) and of 30% when  
55 diagnosed at later stages (1). Almost 80% of ovarian cancer diagnoses occur at advanced stages due to its  
56 non-specific symptoms (2, 3) and lack of tumor-specific screening tools (4). Current screening tools such  
57 as transvaginal ultrasound can assess volume- and morphology-based changes but are non-specific,  
58 leading to false-positive outcomes (4-6). The measure of tumor biomarkers such as CA-125 has met with  
59 little success, due to an overwhelmingly high false-positive rate (7-10). Dochez et al. found that in order  
60 to improve on the current screening platforms that suffer from low specificity in early stages, assessing  
61 the levels of HE4 with CA-125 improves screening efficiency (11). Brodsky et al. identified a 6-gene  
62 signature that differentiates metastatic and primary ovarian lesions (12). While these show potential for  
63 gene signatures to predict disease progression, staging and treatment outcomes, most of these are done  
64 using samples collected from invasive biopsy-derived specimens (13-17).

65  
66 Liquid biopsy, a concept that originated in 1948 with the definition of circulating DNA free from cells in  
67 human blood (18), has bridged the gap by providing a means for disease diagnosis, prognosis, and therapy  
68 decisions in the clinic independent of invasive tissue biopsies. The concept since then has evolved to  
69 include ribonucleic acids, circulating tumor cells, extracellular vesicles (EVs), and tumor educated  
70 platelets. Liquid biopsies can minimize the need for invasive tissue sampling while enabling longitudinal  
71 monitoring during the course of the disease. Most recently, the US Food and Drug Administration (FDA)  
72 has started approval of liquid biopsies as companion diagnostics (19). Cell-free DNA-based tests such as  
73 Guardant360 CDx, for non-small cell lung cancer, Signatera™, for minimal residual disease detection,  
74 FoundationOne® Liquid CDx, for pan-tumor screen are amongst of the recently approved liquid biopsy  
75 platforms (20, 21). One of the most important improvements liquid biopsies offer over traditional tissue  
76 biopsies, is the potential to monitor tumor changes longitudinally (22, 23).

77  
78 Extracellular vesicles (EVs) in particular hold significant promise in the successful application of liquid  
79 biopsies to the clinic. Small extracellular vesicles (sEVs), or exosomes, ranging in size from 40-160nm,  
80 have been shown to be effective carriers of functional proteins and nucleic acids to other cells both in the  
81 local environment and to distant sites (24). The contents of these vesicles are protected from the  
82 degrading circulatory environment and contain multiple molecular markers that are specific to the  
83 primary tumor and its microenvironment (25). ExoDx™ Prostate IntelliScore or EPI, an sEV-based test,  
84 for prostate cancer (26), is the first FDA-approved exosome-based test that focuses on patient  
85 stratification for conducting biopsies.

86  
87 The challenge liquid biopsy-based screening tools face is validated demonstration of earlier detection than  
88 conventional screening tools. This requires large sample sizes and longitudinal tracking of a small  
89 fraction of the population that will develop cancer over time (27). Hence, we tested for the first-time the  
90 potential of a sEV-based ovarian signature to longitudinally predict disease progression in a mouse model  
91 of ovarian cancer metastases (**Box 1**). We explored known ovarian cancer metastatic genes extracted from  
92 several different gene data sets (12, 28-32) to combine targets from disparate studies of tissue biopsies  
93 and evaluate the possibility of using them as biomarkers in a liquid biopsy. These genes (*AEBP1*, *ACTB*,  
94 *COL11A1*, *COL5A1*, *LOX*, *NECTIN4*, *POSTN*, *SNAIL*, *THBS1*, *TIMP3*) as outlined by Cheon, et. al. (28)  
95 have a common functional goal of altering the tumor microenvironment (TME) through collagen

96 remodeling. Collagen remodeling is a key event in metastasis and correlates with poor prognosis in  
97 multiple cancers (33). Collagen remodeling in ovarian cancer is thought to not only contribute to  
98 peritoneal metastases and ascites formation (28) but also to platinum drug resistance (34). In this study,  
99 we demonstrate that extracellular vesicles could be used not only in the identification of ovarian tumors,  
100 but more importantly to detect molecular changes that occur as the tumor progresses and metastasizes.  
101 We found differential expression of the 10-gene panel both in plasma and ascites-derived sEVs collected  
102 from a mouse model of metastatic ovarian cancer. The expression level changes in these genes correlated  
103 with tumor presence and longitudinal tumor progression. We demonstrated a part of our 10-gene  
104 signature to correlate with tumor presence in comparing serum-derived extracellular vesicle gene  
105 signatures from tumor-bearing versus healthy patients. This study reports on the first such feasibility  
106 demonstrated to date of small extracellular vesicles as a liquid biopsy tool for longitudinal  
107 monitoring/screening for ovarian cancer progression.

## 108 **Box1: Author summary**

### **Why was this study done?**

- Ovarian cancer, the second most common gynecological cancer, has a low survival rate primarily due to lack of diagnostic tools to detect tumors at early localized stages.
- Liquid biopsy is emerging as a powerful tool for non-invasive monitoring of tumor progression, metastases prediction, and therapy response.
- Small extracellular vesicles (sEV) have particularly gained attention due to their prevalence in all body fluids, biological stability, and their enhanced ability to capture biological information from parental cells compared to other analytes used in liquid biopsy.
- This was designed as the first such investigation to probe whether a sEV-based diagnostic would elicit tumor specific signatures in ovarian cancers and also follow the longitudinal changes in tumor progression through a change in sEV gene signature.

### **What did the researchers do and find?**

- We established a 10-gene signature involving genes associated with collagen remodeling by validating their correlation to ovarian cancer prognosis using the OvMark dataset. The hazard ratio determined the correlation of gene expression to overall disease-free survival and resulting prognosis.
- Subsequently, using a mouse model of human ovarian cancer peritoneal metastases, we established the fidelity of the 10-gene signature to disease progression as metastases progressed over a three-week period. We found seven of the 10 genes in the signature at quantifiable levels in plasma-derived sEVs.
- When correlated with a small cohort of patient samples, there was a correlation between three of the seven genes in predicting metastases compared to normal serum.
- Additionally, ascites-derived sEVs from the mouse peritoneal metastases model exhibited a quantifiable increase in 5 of the 10 genes in the signature, with a correlation between the signatures from ascites-derived sEVs and plasma-derived sEVs at week 3 of tumor progression.

### **What do these findings mean?**

- Our findings indicate for the first time the possibility of a sEV-derived signature as a diagnostic tool for ovarian cancer metastases prediction.
- The findings were based on a small cohort of animal and human samples and future work will validate this in a larger cohort of samples.
- The findings were based on plasma/serum-derived sEV from a tumor-bearing subject and future work with isolation of a cancer-specific sEV population will provide us with a reproducible signature without non-specific interference from non-cancerous sEVs.

109

110

## 111 **Methods**

112

### 113 **Extracellular vesicle isolation**

114 Extracellular vesicles were isolated from plasma and ascites from mice, and serum from human patients.

115 Plasma/serum was isolated and collected from mice and from human patients. ExoQuick (Systems

116 Biosciences Inc, Mountain View, CA) was used to isolate extracellular vesicles according to  
117 manufacturer's instructions. Briefly, ExoQuick was added to 400-500  $\mu$ l of plasma/serum at a 250  $\mu$ l:63  
118  $\mu$ l ratio (plasma/serum to reagent), mixed thoroughly and incubated for 30min at 4°C. After  
119 centrifugation at 3,000 x g for 10 minutes, the pellet was resuspended in 1x PBS (Gibco, Thermo Fisher  
120 Scientific, Waltham, MA).

121  
122 Ascites collected from mice was centrifuged at 2000 x g for 30 minutes at room temperature to remove  
123 cells and debris. The clarified supernatant (500 $\mu$ l-1ml starting volume) was mixed with a volume of Total  
124 Exosome Isolation-cell culture (Thermo Fisher Scientific, Waltham, MA) equal to half of the supernatant  
125 volume and incubated overnight at 4°C. The samples were then centrifuged at 10,000 x g for 10 minutes  
126 at 4°C. Pellets were resuspended in 1x PBS.

127

### 128 **Extracellular vesicle characterization**

129 Size and concentration measurements were performed using a Malvern Nanosight NS300 (Malvern  
130 Panalytical, UK). Isolated extracellular vesicles were run at a 1:2000 dilution in PBS. Machine settings  
131 were as follows: Camera level: 11-12, data collection: 5x15sec, flow rate: 20, analysis setting: 6-8.

132

### 133 **RNA isolation**

134 RNA was isolated from extracellular vesicles using a modified Trizol protocol. Trizol (Thermo Fisher  
135 Scientific, Waltham, MA) was added to each sample such that the sample volume was 10% of the Trizol  
136 volume. Samples were lysed and incubated for 5 minutes in Trizol and then 1-bromo-3-chloropropane  
137 (BCP) (Molecular Research Center, Inc. Cincinnati, OH) was added to separate the RNA from the  
138 remaining material. The RNA-containing aqueous phase was incubated with isopropanol and RNA was  
139 pelleted by centrifugation. The pellet was subsequently suspended in 75% ethanol and incubated  
140 overnight at -20°C. The next day the RNA was pelleted and washed by an additional incubation with 75%  
141 ethanol. After the second centrifugation, the ethanol was aspirated and the pellet was air-dried for 5  
142 minutes and heated at 65°C for 1-2 minutes to aid in the pellet dissolution. RNA pellets were then  
143 suspended in DNase-/RNase-free water. Total RNA concentration and purity was assessed using a  
144 Nanodrop 2000 (Thermo Fisher Scientific, Waltham, MA). RNA was stored at -80°C.

145

### 146 **cDNA synthesis**

147 DNA was synthesized using the Thermo Fisher High Capacity Reverse Transcription kit according to  
148 manufacturer's instructions (Thermo Fisher Scientific, Waltham, MA). Briefly, a mastermix containing  
149 reverse transcriptase (RT), RT buffer, dNTPs, random primers, and water was added to 30-50  $\mu$ g of RNA.  
150 Samples were run on the Thermo Fisher QuantStudio 3 PCR machine using the following protocol: 25°C  
151 10 minutes, 37°C 120 minutes, 85°C 5 minutes, 4°C hold.

152

### 153 **Quantitative RT-PCR**

154 Quantitative PCR was performed using Thermo Fisher's QuantStudio 3 and TaqMan technology (Thermo  
155 Fisher Scientific, Waltham, MA). TaqMan assays and the TaqMan Fast Advanced Mastermix were used  
156 according to manufacturer's protocol. Briefly, mastermix, assays, water and cDNA were placed in  
157 individual wells of an optical 96 well reaction plate. Samples were run using the following parameters:  
158 50°C 2 minutes, 95°C 10 minutes, 40 cycles of 95°C 15 seconds and 60°C 1 minute, and 4°C hold.  
159 TaqMan assays used are outlined in **Table S1**.

160  
161 Differential gene expression was calculated using the comparative threshold cycle method (35). As  
162 described by Schmittgen and Livak, since all samples came from different animals or human patients,  
163 there is no means to justify which positive sample is compared with which negative sample and therefore  
164 the  $2^{-\Delta\Delta C_q}$  method of relative gene expression quantification could not be used (35). Here, the mean  $\pm$   
165 standard error was calculated as individual data points using  $2^{-\Delta C_q}$ , where  $\Delta C_q = C_q$  (gene of interest) –  $C_q$   
166 (reference gene; *GAPDH*) (35). Where feasible, fold-changes in gene expression were calculated using  
167 these  $2^{-\Delta C_q}$  values. Several  $C_q$  values, particularly in control non-tumor-bearing samples, were classified  
168 as undetermined and therefore relative gene expression could not be quantified for all groups (**Fig S1-S3**).  
169 Individual data points are presented in graphical form on a  $\log_2$  scale, i.e. displaying the  $-\Delta C_q$  values.

### 170 171 ***In vivo* model**

172 All animal studies were approved by and performed in compliance with the Institutional Review Board  
173 for the Animal Care and Facilities Committee at Rutgers University and institutional guidelines on animal  
174 handling. Female athymic nude mice were purchased from Charles River Laboratories (Fairfield, NJ) and  
175 were received between 4-5 weeks of age and allowed to acclimate for one week before initiation of study.  
176 They were housed in sterile disposable cages and provided food and water *ad libitum*.

177  
178 In order to assess longitudinal changes reflected in sEV profiles,  $1 \times 10^5$  SKOV-3 cells were injected  
179 intraperitoneally and allowed to grow for 3 weeks. SKOV-3 cells were previously tagged with red-  
180 fluorescent protein (RFP) allowing for weekly imaging validation of tumor growth prior to blood  
181 collection. Whole body fluorescence imaging was performed with the Bruker In Vivo MS FX PRO  
182 system (Carestream, Woodbridge, CT). Image analysis was performed analyzing pixel fluorescence  
183 intensity using ImageJ. Mice were separated into tumor-bearing and non-tumor-bearing groups (3-6 mice  
184 in each group), as well as time point groups: 5-7 days post injection of tumor cells, 10-15 days post  
185 injection, 20-25 days post injection. All groups underwent various imaging procedures for tumor  
186 identification. At each time point, animals from that group were euthanized according to university and  
187 protocol guidelines and whole blood was extracted by cardiac puncture. Blood was pooled between 2-3  
188 animals in order to have a sufficient starting working volume for RNA extraction from the sEVs.  
189 Reported numbers refer to groups of pooled samples (n=3 means 3 separately pooled groups of 2-3  
190 samples each, total 6-9 animals). Animals in the last time point group were euthanized at the  
191 compassionate endpoint after tumor burden correlated with ascites accumulation. Within 4 hours of  
192 collection, whole blood was separated by centrifugation at  $3000 \times g$  for 10 minutes into plasma, buffy  
193 layer, and red blood cells. Plasma was separated and stored at  $-80^\circ\text{C}$  until further processing.

194  
195 Ascites was collected post-mortem with a 25-26G needle injected into the peritoneal cavity. Some  
196 animals had thick mucousy ascites, requiring the opening of the peritoneal cavity to successfully collect  
197 the ascites. For early stage collection, 1 ml of sterile PBS was injected into the peritoneum and then  
198 extracted to obtain a “peritoneal wash” comparative to the ascites collected at later stages. Peritoneal  
199 wash from 2 animals was combined to obtain enough sample from which to extract sEVs, achieving n=3  
200 from 6 animals. Sufficient volumes of ascites were collected from individual animals in the final week,  
201 allowing for a higher n number.

### 202 203 **Human serum collection and processing**



204 Blood from ovarian cancer patients was collected in BD Vacutainer tubes (BD 367988) from  
205 Biorepository Services at the Rutgers Cancer Institute of New Jersey, under a Rutgers Institutional  
206 Review Board exemption. Following centrifugation (1000 x g, 10 minutes, room temperature), serum  
207 aliquots were immediately frozen at -80°C until use. Normal de-identified human whole blood and serum  
208 were obtained from Innovative Research, Inc. Whole blood was collected and processed by the company  
209 as outlined in their protocol. Briefly, blood was centrifuged at 5000 x g for 10 minutes. Supernatant was  
210 collected and using a plasma extractor into a separate transfer bag, where it was allowed to clot at room  
211 temperature up to 48 hours. Supernatant was then centrifuged at 5000 x g for 20 minutes at 4°C. Serum  
212 was separated and stored at 4°C until shipped.

213

### 214 **Bioinformatic analysis of gene signature correlation with patient outcomes**

215 Assessment of the clinical relevance of the 10-gene panel was performed by analyzing gene expression in  
216 multiple existing databases. We used the OvMark algorithm (36, 37) which was designed to mine  
217 multiple international databases (14 datasets) of ovarian cancer patient outcomes for gene expression  
218 correlation (about 17,000 genes). Datasets that were used included GSE26712, GSE13876, GSE14764,  
219 GSE30161, GSE19161, GSE19829, GSE26193, GSE18520, GSE31245, GSE9899, GSE17260,  
220 GSE32062, TCGA, and an in-house dataset. Each of the 10-genes was evaluated individually in relation  
221 to progression free survival. Multiple parameters were utilized in the analysis, including a median  
222 expression cutoff, histology (serous and endometrioid), and disease stage. The cutoff level indicated that  
223 the median expression level of gene was used to determine high and low expression groups. Data was  
224 expressed in terms of a hazard ratio, which used Cox regression analysis to establish survival analysis. If  
225 the hazard ratio was greater than 1 then it corresponded to poor outcomes, with increasing numbers  
226 indicating the degree to which that poor outcome was expected in the high expression group. A hazard  
227 ratio less than one correlated with a good prognosis. A log-rank p value was determined for the  
228 differences between the high and low expressions of the gene.

229

### 230 **Statistics analysis**

231 Statistical analysis was performed using GraphPad Prism 8 software. For qPCR data, statistical analysis  
232 was performed on  $\Delta C_q$  values. Data were analyzed using one-way ANOVA followed by Tukey's post-hoc  
233 test (comparison of 3 or more groups) or unpaired two-tailed t-test for comparison of two groups,  
234 with  $p < 0.05$  considered statistically significant.

235

### 236 **Results**

#### 237 *Genetic biomarkers correlate with poor clinical outcomes in ovarian cancer*

238 In order to address the effectiveness of EV-derived gene signatures to predict disease progression we first  
239 evaluated the correlation of a known 10-gene panel (**Table 1**), selected from multiple datasets (12, 28-  
240 32), to disease prognosis. The correlation of the expression of the 10 genes in the panel to disease-free  
241 survival was assessed in multiple patient datasets (**Table S2**) using OvMark, a bioinformatics tool  
242 developed by Molecular Therapeutics for Cancer, Ireland (MTCI) (36, 37). Individual genes were added  
243 to the algorithm to determine patient outcomes related to overexpression of these genes. The algorithm  
244 determines a "hazard ratio" using a Cox regression analysis which associates increased gene expression  
245 with either a poor outcome ( $>1$ ) or a good outcome ( $<1$ ). Differences in high expression and low  
246 expression were assessed in relation to disease free survival using Kaplan-Meier estimates and log-rank p  
247 values. Correlation of disease-free survival was assessed for degree of overexpression, histological

248 subtype, and disease stage. Eight genes (*THBS1*, *TIMP3*, *LOX*, *ACTB*, *COL5A1*, *AEBP1*, *COL11A1*, and  
249 *POSTN*) of the 10-gene panel showed that high expression had a significantly greater correlation with  
250 disease-free survival than low expression levels (**Fig 1, Table S3**). *TIMP3* and *POSTN* showed the  
251 greatest difference between high (black line) and low (gray line) expression levels. Neither *NECTIN4* nor  
252 *SNAI1* showed a significant difference between high and low expression and prognosis. Increased  
253 expression of all of the selected genes except *NECTIN4* and *SNAI1* showed significant correlation with  
254 poor clinical outcomes in patients with serous ovarian cancer, but not with the endometrioid subtype  
255 (**Table S4**). Two genes, *LOX* and *THBS1*, did show correlation with a positive clinical outcome in  
256 endometrioid ovarian cancer despite a lack of significance between the high and low expression levels  
257 (**Table S4**). Differences in gene expression were also assessed at varying tumor grades (**Table S5**). Grade  
258 3 tumors showed the greatest difference between high and low expression levels, while both *POSTN* and  
259 *TIMP3* also showed significant differences in grade 1 (**Table S5**). *NECTIN4* and *SNAI1* both expressed  
260 hazard ratios that were less than 1 in grade 3, while *NECTIN4* had similar results in grade 2 tumors  
261 (**Table S5**), signifying that while there was not a significant correlation the trend suggests a need for  
262 further research into their potential as positive prognosticators.  
263



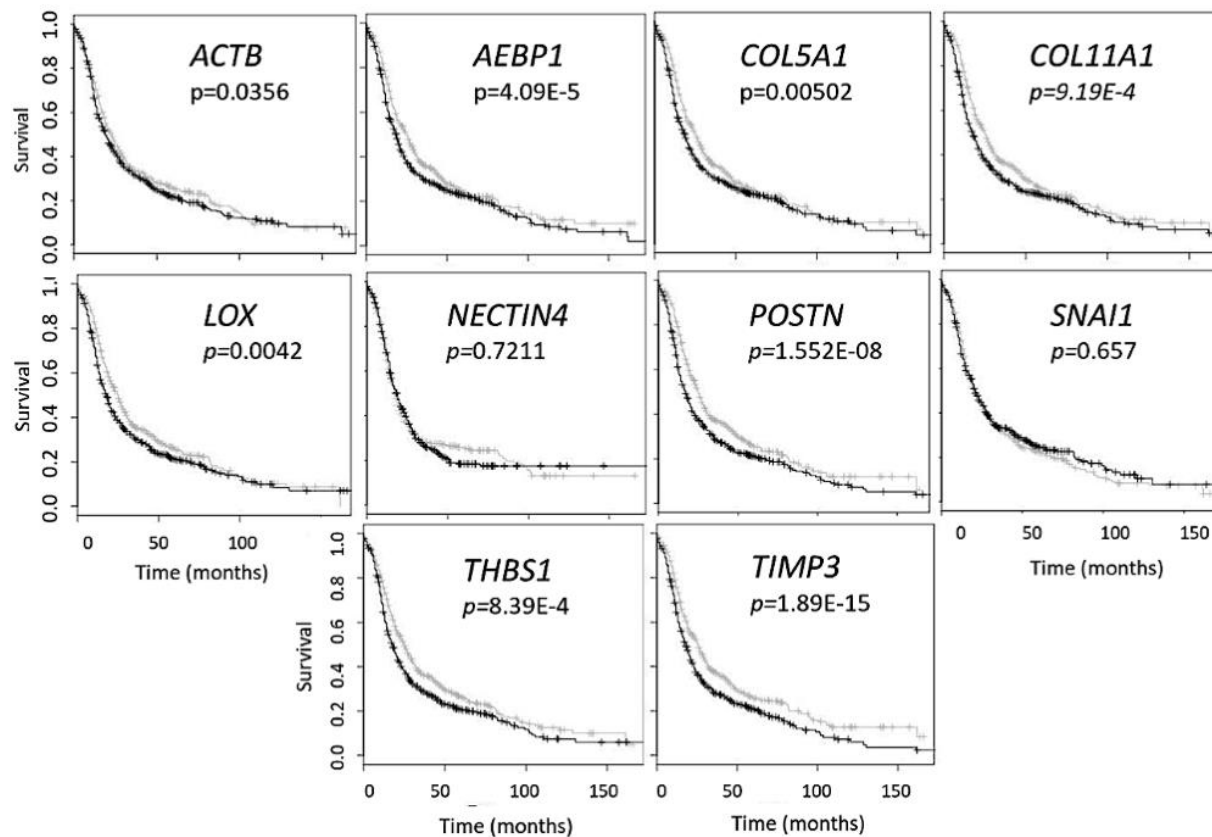

264  
265 **Figure 1.** Gene panel expression correlates with disease-free survival in ovarian cancer patients. Kaplan-  
266 Meier curves show the difference between high expression (black line) of the individual gene and low  
267 expression (grey line). The OvMark algorithm used Cox regression analysis and log-rank p values to  
268 determine the difference in expression levels. *NECTIN4* and *SNAI1* were the only two genes to not show a  
269 significant difference between high and low expression of the disease with regards to disease-free  
270 survival.  
271

272 **Table 1. Genetic biomarkers of ovarian metastasis**

| Gene name      | Overall function                                                   | Ovarian cancer function                                                     | References |
|----------------|--------------------------------------------------------------------|-----------------------------------------------------------------------------|------------|
| <i>ACTB</i>    | Cell motility, stabilization, intercellular signaling              | Invasion, metastasis                                                        | (38)       |
| <i>AEBP1</i>   | Transcriptional repression, cell differentiation                   | Regulate proliferation, increased NF-κB signaling, collagen remodeling      | (39)       |
| <i>COL5A1</i>  | Extracellular matrix (ECM) structure, binds DNA                    | Proliferation, migration, chemoresistance                                   | (40)       |
| <i>COL11A1</i> | ECM structure and binding                                          | Cell invasion, tumor formation                                              | (41)       |
| <i>LOX</i>     | Collagen crosslinking, ECM remodeling                              | Tumor cell invasion, collagen crosslinking                                  | (42)       |
| <i>NECTIN4</i> | Cell adhesion                                                      | Epithelial-mesenchymal transition (EMT), adhesion, migration, proliferation | (43)       |
| <i>POSTN</i>   | Adhesion and migration                                             | Cancer stem cell maintenance and metastasis, EMT                            | (44)       |
| <i>SNAI1</i>   | EMT, cell migration, transcription repression                      | EMT, invasion, proliferation                                                | (45)       |
| <i>THBS1</i>   | Binds extracellular proteins, regulates intercellular interactions | Regulate growth and adhesion, migration of tumor cells                      | (46)       |
| <i>TIMP3</i>   | Inhibits matrix metalloproteinases                                 | Tumor suppressor, inhibits angiogenesis                                     | (47)       |

273  
 274  
 275 *Plasma-, serum-, and ascites-derived extracellular vesicles conform to size characteristics of small*  
 276 *extracellular vesicles (sEVs)*  
 277 While standardized protocols and guidelines for the isolation and purification of extracellular vesicles  
 278 (EVs) are still under debate, particle sizing is a commonly accepted method of vesicle classification (48,  
 279 49). Based on guidance issued by the International Society for Extracellular Vesicles, current optical  
 280 measurements such as dynamic light scattering and nanoparticle tracking analysis (NTA) are used for  
 281 characterization and quantification of extracellular vesicles (49). We characterized small extracellular  
 282 vesicles (sEVs) isolated from plasma/serum and ascites using a commercial polymer precipitation method  
 283 (ExoQuick). Isolated sEVs had a mean size of 126.6 nm (mean range of 78.5-157.5 nm) and a mode size  
 284 of 96.5 nm (mode range of 63.1-119.4 nm) and representative histograms of sEV sizes from mouse  
 285 plasma, mouse ascites, and human serum are as shown in **Figure 2a-c** respectively. **Figure 2d** shows a  
 286 representative snapshot of sEVs measured using Nanosight NS300. The sizes were in accordance with  
 287 acceptable ranges for sEVs (24, 49). Specifically, mouse plasma had a mean size of 125±3 nm and mode  
 288 size of 96.5±3 nm (**Fig 2e**). Mouse ascites-derived vesicles were slightly larger with a mean size of  
 289 145.1±6.7 nm and a mode of 114.3±1.3 nm (**Fig 2e**). Vesicles isolated from human serum-derived  
 290 vesicles had a mean size of 121.5±4.9 nm and mode size of 97.1±4.5 nm (**Fig 2e**). Vesicle size was  
 291 similar independent of source of material (p = 0.106, one-way ANOVA for mean size, p = 0.175, one-

292 way ANOVA for mode size), indicative of consistency in extracellular vesicle isolation results and  
 293 comparable EV populations between biofluid sources and tumor conditions evaluated in this study.  
 294

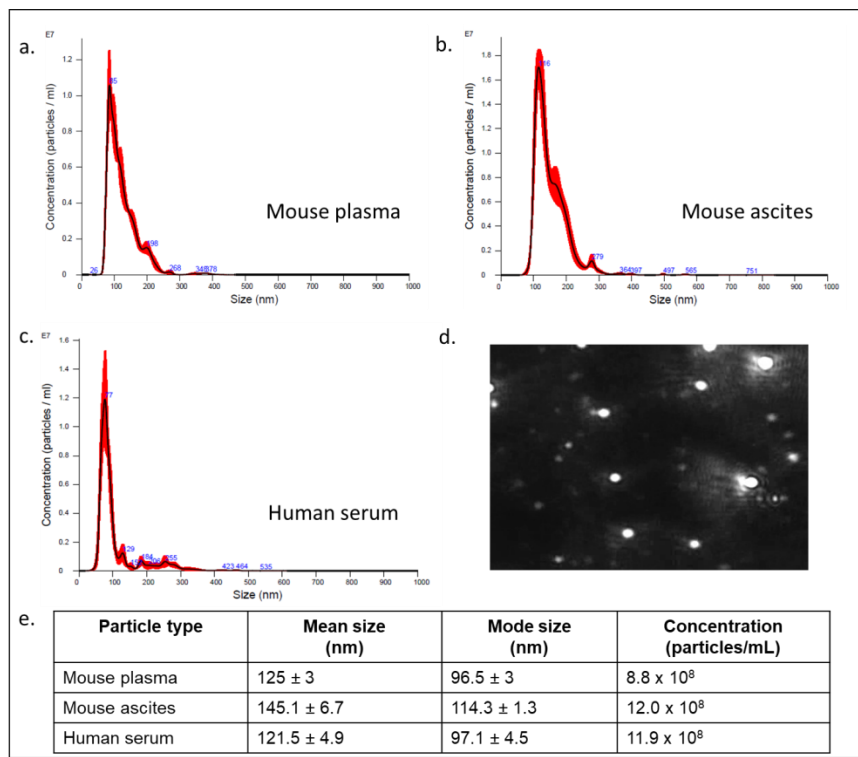

295  
 296  
 297 **Figure 2.** Small extracellular vesicle (sEV) isolation from mouse plasma, ascites, and human plasma  
 298 shows similar sized populations independent of biofluid. Representative sizing of vesicles isolated from **a.**  
 299 mouse plasma, **b.** mouse ascites, and **c.** human serum. **d.** Representative image of mouse plasma vesicles  
 300 on the Nanosight N300. **e.** sEV from plasma from mice had an average mode size of 96.5±3 nm and  
 301 concentration of 8.8×10<sup>8</sup> particles/ml. sEV from ascites from mice had an average mode size of  
 302 145.1±6.7nm and a concentration of 12.0×10<sup>8</sup> particles/ml. sEV from human serum had an average mode  
 303 size of 121.5±4.9nm and a concentration of 11.9×10<sup>8</sup> particles/ml.

304  
 305 *Genetic expression levels change with longitudinal tumor development and progression in a mouse model*  
 306 *of ovarian cancer*

307 The challenge in ovarian cancer is early detection of disease, as the current screening tools are either not  
 308 sensitive enough or invasive screening techniques are usually not employed at the earlier asymptomatic  
 309 stages of the disease. Existing screening tools that are invasive and require biopsied specimens do not  
 310 allow for longitudinal monitoring of a probable genetic signature that can predict metastatic potential and  
 311 tumor progression. The advantage of the sEV-based liquid biopsy tool would be the ability of sEVs to  
 312 package the genetic information from the tumor and its microenvironment allowing for its preservation  
 313 once it is in the peripheral circulation. In order to assess the potential of sEVs as screening tools we  
 314 determined the validity of the 10-gene signature to correlate with tumor progression in a SKOV-3 (human  
 315 epithelial ovarian cancer cell line)-derived mouse model of ovarian cancer metastases. SKOV-3 cells  
 316 were injected into the peritoneal cavity of athymic nude mice, and plasma was collected from animals  
 317 euthanized at weekly intervals. Tumor growth in the peritoneal cavity was validated by fluorescent

318 imaging (**Fig 3a-c**). sEVs were extracted from the collected plasma and the 10-gene signature was  
319 evaluated. Of the 10-gene signature, seven genes were expressed at quantifiable levels as determined by  
320 qRT-PCR.

321  
322 We initially compared plasma-derived sEV gene expression in tumor-bearing animals to non-tumor-  
323 bearing controls during weeks 1, 2, and 3 of tumor development. As shown in **Figures 3d and 3e**, there  
324 was minimal or no expression of the 10-gene signature in non-tumor-bearing mice during weeks one and  
325 two of tumor development, which precluded quantification of differential gene expression. However, this  
326 absence of target gene expression in control mice (highlighted by the number of non-detected  $C_q$  values  
327 underneath the scatter plots and **Fig S1**) compared to the presence of the target gene in tumor-bearing  
328 animals does indicate an increase in gene expression. During week 3 of tumor development, non-  
329 quantifiable increases in gene expression of tumor-bearing sEVs were observed in *COL5A1* and *SNAI1*  
330 (absence vs. presence of target gene  $C_q$  values), and significant quantifiable increases in gene expression  
331 were observed in *LOX* ( $p = 0.0318$ , 4.37-fold change) and *ACTB* ( $p = 0.0006$ , 16.3-fold change) (**Fig 3f**).  
332 The corresponding heatmaps showing the percentage of detected  $C_q$  values for weeks 1-3 are as shown in  
333 **Figure 3g-i** respectively.

334  
335 There is a correlation between gene signature and tumor progression suggesting the potential for sEV-  
336 based liquid biopsy as a longitudinal monitoring tool in ovarian cancer. As shown in **Figure 3j**, *ACTB*  
337 expression significantly increased after the first week of tumor progression and remained elevated until  
338 the end of the experiment ( $p = 0.0007$ , One-way ANOVA; Tukey's post-test: Week 1 vs Week 2:  $p =$   
339  $0.0014$ , Week 1 vs Week 3:  $p = 0.0009$ ). This corresponds to an 18.4-fold increase in *ACTB* expression  
340 between weeks 1 and 2 of tumor development. The absence/presence of target gene expression (i.e.  
341 undetermined vs. measured  $C_q$  values) is another indicator of increasing gene expression. Expression of  
342 genes such as *AEBPI*, *SNAI1*, and *LOX* similarly increased after the first week of tumor progression,  
343 although these changes could not be quantitatively compared to week 1 due to undetermined  $C_q$  values at  
344 this time point (**Fig 3d-f**).

345

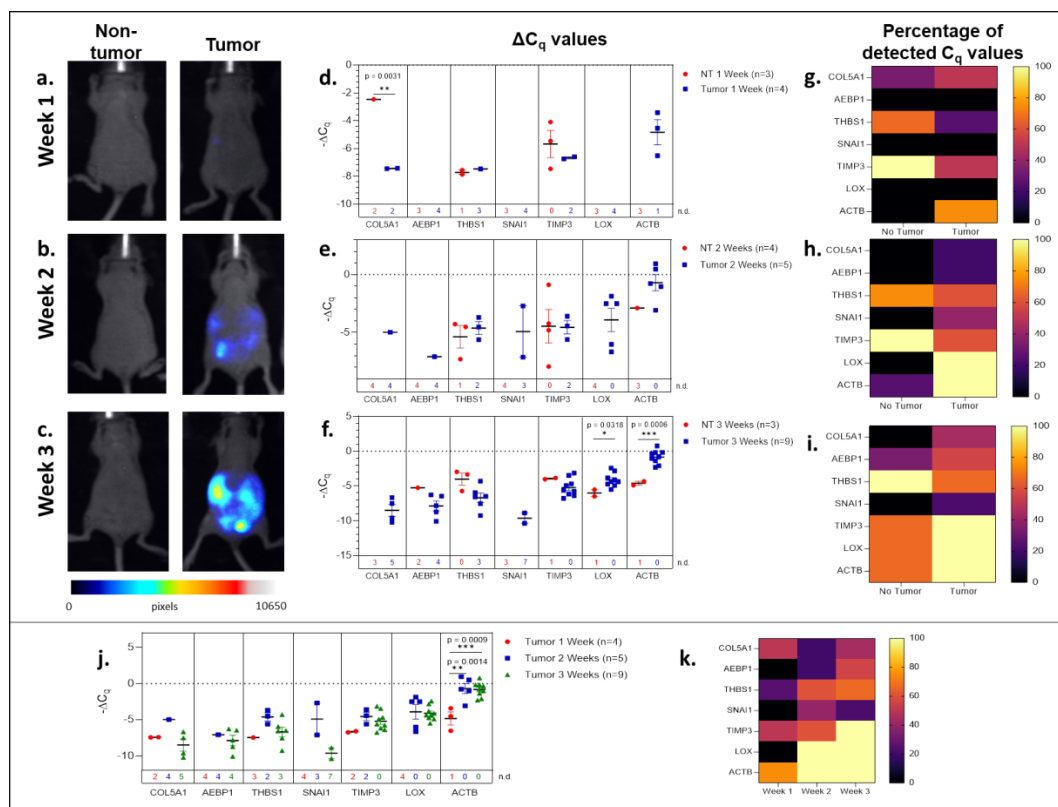

346  
347

348 **Figure 3:** Plasma-derived sEV gene expression in a mouse model of ovarian cancer. Representative  
349 fluorescent imaging of SKOV-3/RFP cells in tumor-bearing and non-tumor-bearing mice in **a.** Week 1, **b.**  
350 Week 2, and **c.** Week 3. Scatter plots of  $\Delta C_q$  values at **d.** Week 1 for tumor- (blue, n=4) and non-tumor-  
351 bearing samples (red, n=3), **e.** Week 2 for tumor- (blue, n=5) and non-tumor-bearing samples (red, n=4),  
352 and **f.** Week 3 for tumor (blue, n=9) and non-tumor-bearing samples (red, n=3). Heat maps showing the  
353 percentage of detected  $C_q$  values at **g.** Week 1, **h.** Week 2, and **i.** Week 3. **j.** Scatter plot of  $\Delta C_q$  values for  
354 tumor-bearing samples over Weeks 1-3 of tumor development; **k.** Heat map showing the percentage of  
355 detected  $C_q$  values in tumor-bearing samples for Weeks 1, 2, and 3. p values for unpaired two-tailed t-test  
356 are labeled in the graphs. The number of non-detected (n.d.)  $C_q$  values in each experimental group are  
357 listed underneath the corresponding scatter plots. Heat maps in g, h, i, and k indicate the absence/presence  
358 of the target gene (percentage of detected  $C_q$  values) in each experimental group.

359

360 *Select genes were differentially expressed in sEVs isolated from human serum based on tumor presence,*  
361 *histopathological characterization, and TNM staging*

362 In order to determine the fidelity of the signature from mouse ovarian cancer studies, we evaluated the  
363 expression of the 10-gene panel in a small cohort of patient samples. We determined the ability of the 10-  
364 gene signature to distinguish between tumor and non-tumor/normal human samples, and within the tumor  
365 samples stratified by metastasis, histological subtypes, or TNM (tumor, node, and metastasis) staging. To  
366 this end, we compared serum-derived sEVs from eleven patients with ovarian cancer and three cancer-  
367 free patients. Collected samples came from different histological subtypes and varying TNM stages  
368 (**Table S6**) and the 10-gene signature was evaluated using quantitative RT-PCR. Three genes within the  
369 10-gene signature (*ACTB*, *THBS1*, and *TIMP3*) were found to be expressed at quantifiable levels in the

370 collected patient samples. The most notable difference was seen when comparing metastatic vs non-  
 371 metastatic tumors, where the samples from patients with metastatic tumors had significantly higher  
 372 expression of *THBS1* compared to those from patients with non-metastatic tumors ( $p = 0.0192$ , 4.53-fold  
 373 change) (**Fig 4a**). However, when these patient samples were scored based on TNM staging, due to small  
 374 sample sizes and non-quantifiable levels of mRNA (i.e. undetermined  $C_q$  values) no significant  
 375 differences were found (**Fig 4b**). Although trends indicate an increase in *ACTB* and *THBS1* expression in  
 376 ovarian cancer patients compared to healthy control subjects, differences in  $\Delta C_q$  values were not  
 377 significantly different due to low sample numbers (**Fig 4c**). The limited expression of these genes in the  
 378 healthy control subjects hindered robust statistical analysis of differential gene expression. As mentioned  
 379 earlier, the absence/presence of target gene expression (i.e. undetermined vs. measured  $C_q$  values; **Fig S2**)  
 380 is another indicator of increasing gene expression in the tumor-bearing serum samples (50, 51). As shown  
 381 in **Table S6**, the patient samples were also stratified into 4 different histological subtypes: serous, clear  
 382 cell, endometrioid, and mixed. No significant differences were found in sEV gene expression between  
 383 these histological subtypes, likely due to small sample sizes and non-quantifiable levels of mRNA (i.e.  
 384 undetermined  $C_q$  values) for several of these samples (**Fig 4d**). Due to low sample sizes and limited  
 385 expression of the selected genes in the healthy control samples, it was difficult to evaluate the ability of  
 386 serum-derived sEVs to indicate ovarian tumor presence in human samples in this study.  
 387

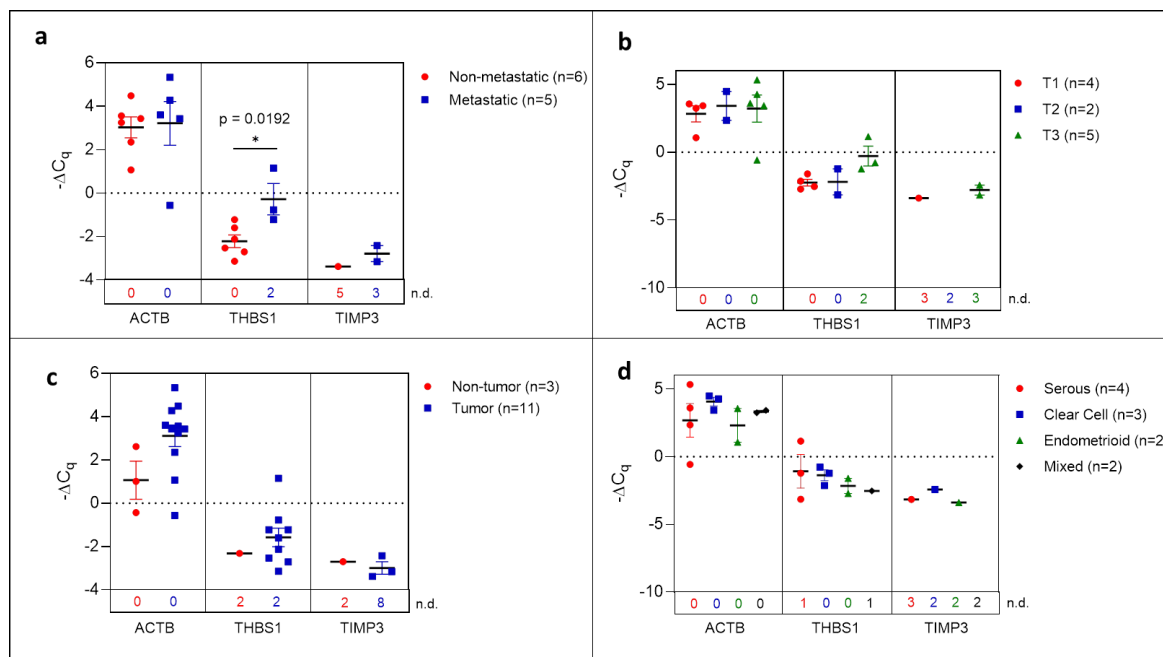

388  
 389  
 390 **Figure 4.** Plasma-derived sEV gene expression in human samples. Scatter plots of  $\Delta C_q$  values comparing  
 391 **a.** serum from metastatic and non-metastatic samples, **b.** samples stratified by TNM staging **c.** tumor-  
 392 bearing and non-tumor-bearing samples, and **d.** samples stratified by histology. P values indicated were  
 393 determined via unpaired two-tailed t-test. The number of non-detected (n.d.)  $C_q$  values in each  
 394 experimental group are listed underneath the corresponding scatter plots.  
 395  
 396  
 397



398 *Metastasis markers identified in sEVs extracted from ascites*

399 A hallmark of advanced ovarian cancer is the presence of ascitic fluid in the peritoneal cavity and  
400 palliative therapy often requires repetitive drainage of this fluid (52) making this a possible analyte for  
401 liquid biopsy. In the SKOV-3 peritoneal metastasis mouse model, we determined the 10-gene signature  
402 trend in correlation to disease progression from ascites-derived sEVs. During the first week of tumor  
403 development and in non-tumor-bearing mice, ascites was not present. In order to assess sEV profiles at  
404 early stages, PBS was injected into the peritoneum and extracted as a peritoneal wash containing sEVs.  
405 This was then compared to the ascites collected during later stages of disease progression.

406  
407 Initially, ascites-derived sEV gene expression in tumor-bearing animals was compared to non-tumor-  
408 bearing controls during longitudinal tumor progression. Due to the absence of measurable ascitic fluid  
409 and similar to plasma-derived sEVs, there was limited or no expression in non-tumor-bearing mice during  
410 weeks one (**Fig 5a**) and two (**Fig 5b**). The absence of the target gene (undetermined  $C_q$  values) in control  
411 animals compared to the presence of the target gene in tumor-bearing animals again indicates a non-  
412 quantifiable increase in gene expression (**Fig S3**). **Figure 5b** illustrates this non-quantifiable increase in  
413 the expression of *COL5A1*, *AEBP1*, *SNAI1*, *LOX*, and *ACTB* in tumor-bearing mice after 2 weeks of  
414 tumor development. During week 3 of tumor development, non-quantifiable increases in gene expression  
415 were observed in *COL5A1*, *THBS1*, *COL11A1*, and *SNAI1*, and significant quantifiable increases in gene  
416 expression were observed in *AEBP1* ( $p = 0.0379$ , 46.5-fold change), *LOX* ( $p = 0.0017$ , 5.81-fold change),  
417 and *ACTB* ( $p < 0.0001$ , 22.6-fold change) (**Fig 5c**). This trend of increasing gene expression over the  
418 three weeks of tumor progression is also evident when comparing  $\Delta C_q$  values of the tumor-bearing  
419 animals over time (**Fig 5d**). There were significant increases in *COL5A1* ( $p = 0.0332$ , one-way ANOVA),  
420 *TIMP3* ( $p = 0.0206$ , one-way ANOVA; Tukey's post-test:  $p = 0.0248$ , Week 1 vs Week 3), *LOX* ( $p =$   
421  $0.0037$ , one-way ANOVA; Tukey's post-test:  $p = 0.0029$ , Week 1 vs Week 3), and *ACTB* expression ( $p =$   
422  $0.0047$ , one-way ANOVA; Tukey's post-test:  $p = 0.0035$ , Week 1 vs Week 3) at week 3 compared to  
423 week 1. These differences in  $\Delta C_q$  values correspond to a 19.3-fold change in *COL5A1* expression, 61.3-  
424 fold change for *TIMP3*, 3.92-fold change for *LOX*, and 6.12-fold change for *ACTB*. The smaller fold-  
425 change increases in longitudinal expression of *LOX* and *ACTB* suggest that these two genes are expressed  
426 more strongly in ascites-derived sEVs at earlier time points compared to other genes in the 10-gene  
427 signature. The gene expression patterns seen in the ascites-derived sEV samples validate those seen in the  
428 plasma-derived sEV samples, and further demonstrate the potential for sEVs to distinguish between  
429 tumor-bearing and non-tumor-bearing samples.

430

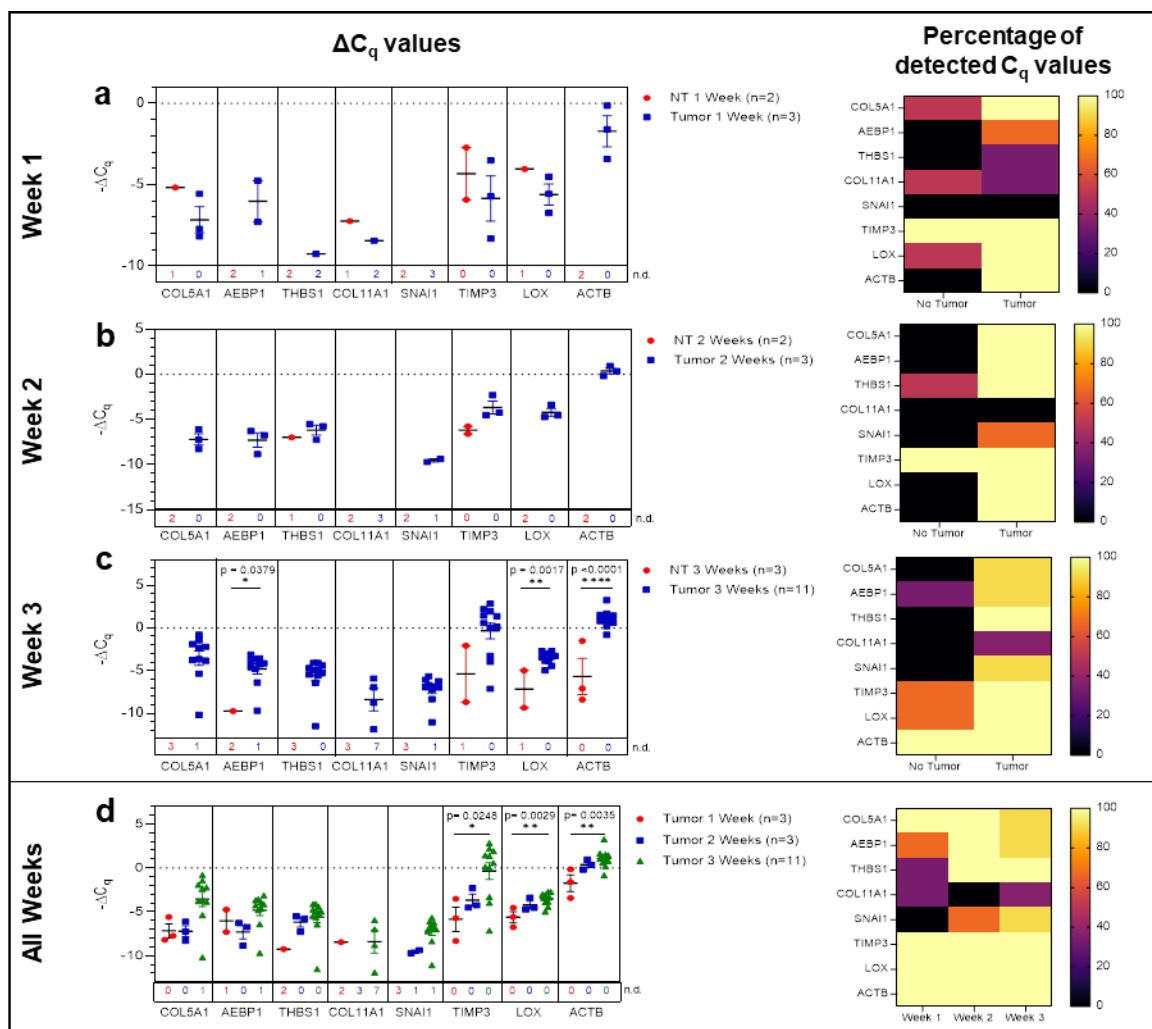

431  
 432  
 433 **Figure 5.** Ascites-derived sEV gene expression in a mouse model of ovarian cancer. Scatter plots of  $\Delta C_q$   
 434 values and heat maps showing the percentage of detected  $C_q$  values at **a.** Week 1, tumor- (blue, n=3) and  
 435 non-tumor-bearing samples (red, n=2); **b.** Week 2, tumor- (blue, n=3) and non-tumor-bearing samples  
 436 (red, n=2); **c.** Week 3, tumor- (blue, n=11) and non-tumor-bearing samples (red, n=3); **d.** over Week 1  
 437 (red, n=3), Week 2 (blue, n=3), and Week 3 (green, n=11) of tumor development. p values for unpaired  
 438 two-tailed t-test are labeled in the graphs. The number of non-detected (n.d.)  $C_q$  values in each  
 439 experimental group are listed underneath the corresponding scatter plots. Heat maps indicate the  
 440 absence/presence of the target gene (percentage of detected  $C_q$  values) in each experimental group.

441  
 442 *Correlation of genetic signature between tumor-derived sEVs from the niche and peripheral circulation*  
 443 One of the major barriers in the success of liquid biopsy tools as diagnostics is the lack of standardization  
 444 and reproducibility (49, 53, 54). In order to establish a liquid biopsy tool that can prognosticate disease  
 445 progression, it is important to determine the correlation between gene signature at tumor site and in  
 446 peripheral circulation. Hence, we determined if the TME genetic signature would correlate with the  
 447 signature obtained from peripheral circulation. Towards this, we compared gene expression of the ascites-  
 448 derived sEVs from the peritoneal cavity to that of the plasma-derived sEVs (**Fig 6**), demonstrating a  
 449 concordance in expression patterns overall.

450  
 451 During early tumor progression (weeks 1 and 2 of development), there was no significant difference in  
 452 plasma-derived and ascites-derived sEV gene expression, however, differences in expression of certain  
 453 genes (*AEBP1*, *COL11A1*, and *LOX*) could not be quantified at week 1 due to undetermined  $C_q$  values in  
 454 the plasma samples (**Fig 6a and 6b**). In the final week of tumor progression in the mice with the expected  
 455 late-stage development of ascites, gene expression was overall higher in the ascites-derived samples, with  
 456 significant increases in *COL5A1* ( $p = 0.0056$ , 43.1-fold change), *AEBP1* ( $p = 0.0093$ , 8.54-fold change),  
 457 *TIMP3* ( $p = 0.0004$ , 58.4-fold change), and *ACTB* ( $p = 0.0004$ , 3.98-fold change) (**Fig 6c**). The data  
 458 suggest that sEVs sampled from ascitic fluid are likely a stronger indicator of tumor presence compared to  
 459 sEVs sampled from plasma, though both show upregulation of genes in the 10-gene signature panel (**Fig**  
 460 **6d**) that correspond to longitudinal changes in tumor progression.  
 461

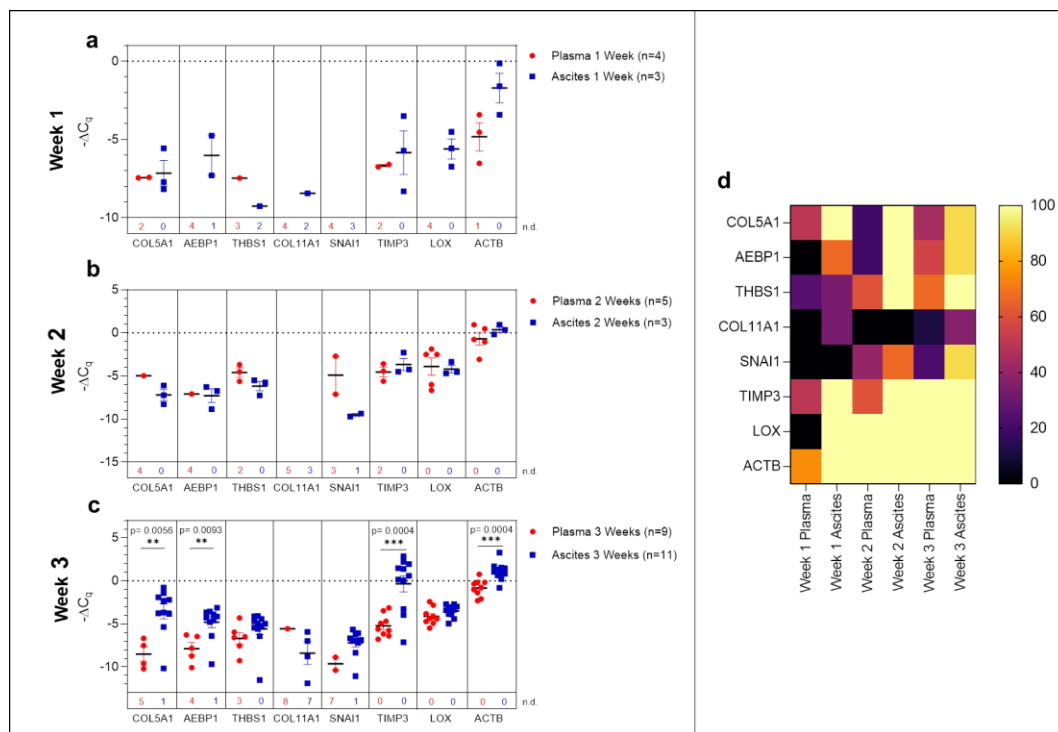

462  
 463  
 464 **Figure 6.** Comparison of plasma-derived and ascites-derived sEV gene expression in a mouse model of  
 465 ovarian cancer. Scatter plot of  $\Delta C_q$  values for plasma-derived and ascites-derived sEVs at: **a.** Week 1  
 466 plasma (red, n=4) and ascites (blue, n=3); **b.** Week 2 plasma (red, n=5) and ascites (blue, n=3); **c.** Week 3  
 467 plasma (red, n=9) and ascites (blue, n=11). **d.** Heat map showing the percentage of detected  $C_q$  values  
 468 over Weeks 1-3 indicates the absence/presence of the target gene in each experimental group. p values for  
 469 unpaired two-tailed t-test are labeled in the graphs. The number of non-detected (n.d.)  $C_q$  values in each  
 470 experimental group are listed underneath the corresponding scatter plots.

471  
 472 **Discussion**

473 Ovarian cancer treatment has been a challenge due to its asymptomatic nature in early stages of the  
 474 disease leading to eventual detection at advanced stages, which then results in low survival rates (1, 2, 14-  
 475 16). Current screening and monitoring tools for ovarian cancer lack specificity and often lead to false

476 positives, which require invasive follow-up biopsies (4-7, 13). There is a need for non-invasive  
477 monitoring tools that can perform with more sensitivity than the current tools, transvaginal ultrasound and  
478 CA-125 testing.

479  
480 The emerging era of genomics is transforming the field of oncology by allowing for development of new  
481 diagnostics and therapeutics that tailor to specific tumor types and stages (55). Liquid biopsy is the next  
482 generation diagnostic that integrates genetic signatures for disease profiling. To date, several liquid  
483 biopsy-based companion diagnostics have been approved by the FDA (56). While most of the approved  
484 diagnostics are typically based on circulating cell-free DNA, the use of EVs and exosomes as messengers  
485 of tumor presence (57) in order to improve diagnostic abilities is actively being explored. In 2019, the  
486 first diagnostic tool to employ EVs in clinical diagnostics, Bio-Techne's ExoDx Prostate IntelliScore  
487 (EPI) test, was given FDA Breakthrough Device Designation, and is currently in use in the clinic (26).  
488 Circulating sEVs have the potential to address the weaknesses of tissue biopsies to monitor tumor  
489 progression and changes longitudinally. This can be applied in diagnostics (58), prognostics (59), and  
490 therapeutics (60), making it a crucial technology to advance (25, 61).

491  
492 Our goal with this research was to establish a tumor-derived EV-based genetic signature that originated  
493 from gene expression analysis patient datasets of ovarian cancer. Peritoneal spread of metastatic lesions  
494 requires tumor cells to escape from the primary tumor, disseminate through the peritoneal cavity, adhere  
495 and invade into the peritoneal lining and then establish lesion growth (62). Each step is characterized by  
496 different molecular changes. The extracellular matrix (ECM) is a key component of the TME, and  
497 undergoes remodeling during many of the stages of metastasis establishment (63-65). This remodeling  
498 plays a key role particularly in the development and progression of many epithelial cancers including  
499 ovarian cancer (33, 34, 66-68). Our 10-gene signature, which overlaps with the signature elucidated by  
500 Cheon et al., was thus focused on collagen remodeling genes that are implicated in invasion and  
501 metastases in cancer (34, 67, 68). Through bioinformatic analysis using published datasets such as that of  
502 Cheon et al. (28), a ten gene signature that was overexpressed in ovarian cancer (28, 69) and was focused  
503 on collagen remodeling (**Table 1**) was selected. An established OvMark (36, 37) derived analysis of the  
504 10-gene signature showed a clear association of eight of the ten genes to expression-based disease  
505 prognosis (**Fig 1**).

506  
507 In this study, we explored the feasibility of a longitudinal sEV-based gene signature that would be  
508 predictive of metastasis progression in a mouse model of ovarian cancer. In this study, we isolated sEVs  
509 from both plasma and ascites from the mouse model and from human ovarian cancer patients' serum. The  
510 sEVs were characterized based on NTA (**Fig 2**) and validated to conform to the acceptable size range for  
511 sEVs (49). We were able to show a quantifiable change in seven genes (*COL5A1*, *AEBP1*, *THBS1*,  
512 *SNAI1*, *TIMP3*, *LOX* and *ACTB*) of the 10-gene signature in plasma-derived sEVs longitudinally over the  
513 three-week period (**Fig 3**). Of the seven genes, *AEBP1* overexpression plays an important role in  
514 stimulating the crosstalk between the ECM and the pro-inflammatory NF- $\kappa$ B pathway inducing metastatic  
515 processes (29, 39), and *TIMP3*, a key regulator of ECM degradation that has been linked to a metastatic  
516 signature identifying aggressive tumors (12). *COL5A1*, *SNAI1*, *LOX*, and *ACTB* are mediators of ECM  
517 integrity (70). The most significant differences were observed in expression of *LOX*, a gene activated by  
518 hypoxia to enable invasive potential by crosslinking collagen (42) and *ACTB*, a gene very active in the  
519 metastatic process of epithelial to mesenchymal transition (EMT) and cell migration (38, 71, 72). We

520 were able to observe significant quantifiable differences in only two of the seven genes mainly due to  
521 limited samples and a small animal cohort. Despite the lack of quantitative values to evaluate statistical  
522 significance, consistent undetermined values at initial time points (**Fig S1-S3**) represent a noteworthy  
523 change and the presence of a dynamic tumor environment being reflected in the sEVs. Our findings also  
524 extended to correlate the plasma-derived sEV signature obtained from our animal model to human serum-  
525 derived sEV from ovarian cancer patients. We found notable differences in *ACTB* and *THBS1* when  
526 compared to control serum, and in *THBS1* when comparing metastatic to non-metastatic patient samples  
527 (**Fig 4**). *THBS1* is known to play a role in cell-cell and cell-matrix interactions that are key for metastases  
528 progression to the peritoneal space in ovarian cancer (46). Given the limited nature of our patient cohort,  
529 future studies will be necessary to advance these findings to a larger cohort of samples. Additionally, sEV  
530 heterogeneity and contamination from non-tumor-derived sEVs also play a role in the fidelity and  
531 significance of the gene signature (73, 74). Future studies will focus on enrichment for cancer-specific  
532 sEVs to increase the sensitivity of the biomarkers for early detection, progression and metastasis.

533  
534 Given the heterogeneous nature of the plasma-derived sEVs, in an effort to probe the reliability of the  
535 plasma-derived signature, we explored the significance of the 10-gene signature in disease progression  
536 from the TME. We isolated sEVs from ascites sampled from a mouse model of peritoneal ovarian cancer  
537 metastases and found a quantifiable change in seven genes (*COL5A1*, *AEBP1*, *THBS1*, *SNAI1*, *COL11A1*,  
538 *LOX* and *ACTB*) of the 10-gene signature longitudinally over the three-week period (**Fig 5**). In addition to  
539 *LOX* and *ACTB*, which were highly significant in the plasma-derived sEV signature, there were also  
540 significant differences in *AEBP1* expression, with its pro-inflammatory stimulation of metastasis (29, 39).  
541 *COL11A1*, which was absent in plasma-derived sEVs but present in the ascites-derived signature, has  
542 been correlated with advanced disease stages (41).

543  
544 When signatures from plasma- and ascites-derived sEVs were compared we found significant differences  
545 in expression of *COL5A1*, *AEBP1*, *TIMP3*, and *ACTB* at week 3 of tumor progression (**Fig 6**), suggesting  
546 that ascites-derived sEVs are likely a stronger indicator of tumor presence compared to plasma-derived  
547 sEVs. However, there were no significant differences in ascites vs. plasma-derived sEV expression of  
548 *THBS1*, *COL11A1*, *SNAI1*, and *LOX*. Further, plasma-derived sEV expression of *COL5A1* and *ACTB*  
549 could be used to indicate tumor presence when comparing tumor-bearing and healthy control samples at  
550 this time point. This pattern suggests that sEV contents in the periphery reflect changing molecular and  
551 functional states within the TME, enabling the use of plasma-derived sEVs as potential analytes for liquid  
552 biopsy to discern tumor progression.

553  
554 While our focus was on demonstrating the plausibility of a sEV-based screening tool in a mouse model of  
555 ovarian cancer, several limitations of this study should also be acknowledged. One of the major  
556 limitations was while plasma would be the most suitable analyte for non-invasive screening, plasma-  
557 derived exosomal burden is low requiring larger plasma volumes. In our mouse model of ovarian cancer,  
558 this would have required a large cohort of animals per group for the longitudinal study. We had plasma  
559 volumes of <1ml even with pooled samples (n=2-3 animals) and this had an impact on exosomal burden  
560 and also the extracted RNA from this population. Correlation of our findings from the preclinical mouse  
561 model with plasma-derived sEVs from patients while encouraging, is still preliminary. Future studies will  
562 require larger patient cohort samples to further establish clinical validity of a sEV-based screening tool  
563 for ovarian cancer.

564  
565 This study shows promise for the use of sEVs in cancer diagnosis and longitudinal disease monitoring in  
566 ovarian cancer. Liquid biopsies that use analytes such as sEVs carry tremendous clinical potential (75) but  
567 there is a need to validate our findings in larger patient cohorts towards developing a transformative non-  
568 invasive diagnostic with greater accuracy for early detection of ovarian cancer.

569  
570 **Acknowledgements**

571 The authors would like to thank the Rutgers University Molecular Imaging Core and Derek Adler for  
572 access to and assistance with the fluorescent imaging validation for this study. We also are appreciative to  
573 Arash Hatefi and Suzie Chen in the School of Pharmacy at Rutgers University for access to their  
574 Nanosight NS300 machine used in our NTA experiments.

575 **Author contributions**

576 AG, PVM, and VG contributed to the conceptualization and design of the study. Investigation was  
577 performed by AG, NZ, JVS, JNS, BI, SG and VG. Formal analysis and project administration was  
578 performed by AG, NLF, and VG. PVM and VG were responsible for supervision. PVM, MK, and SKL  
579 contributed to resources and writing-review and editing. AG, NLF, and VG were responsible for  
580 visualization and writing-original draft preparation. All authors contributed to manuscript revision, read,  
581 and approved the submitted version.

582  
583 **Funding sources**

584 Funding for this study was provided by the National Institutes of Health (NIH) National Institute of  
585 Biomedical Imaging and Bioengineering (R01-EB018378-06), authors PVM and VG  
586 (<https://www.nibib.nih.gov/>); the New Jersey Commission on Cancer Research (DCHS20PPC036) author  
587 JVS (<https://www.nj.gov/health/ces/cancer-researchers/njcct/>); the National Science Foundation (NSF  
588 1803675) authors PVM, NLF, NZ (<https://www.nsf.gov/>); and the NIH National Institute of General  
589 Medical Sciences T32 GM135141, author JNS (<https://www.nigms.nih.gov/>). The funders had no role in  
590 study design, data collection and analysis, decision to publish, or preparation of the manuscript.

591  
592 **Data availability statement**

593 The datasets generated for this study are available on request to the corresponding authors.

594  
595 **Supplemental figure and table captions.**

596



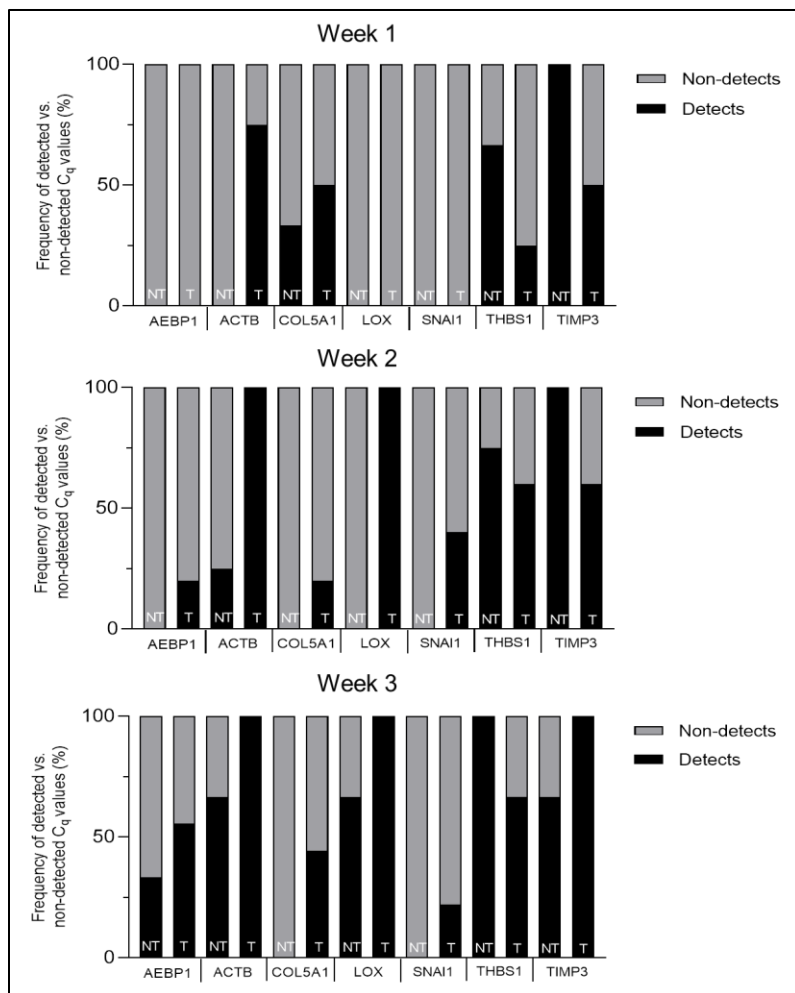

597  
598  
599  
600  
601

**Supplemental figure 1:** Frequency plots of detected vs. non-detected  $C_q$  values in plasma-derived sEV samples.

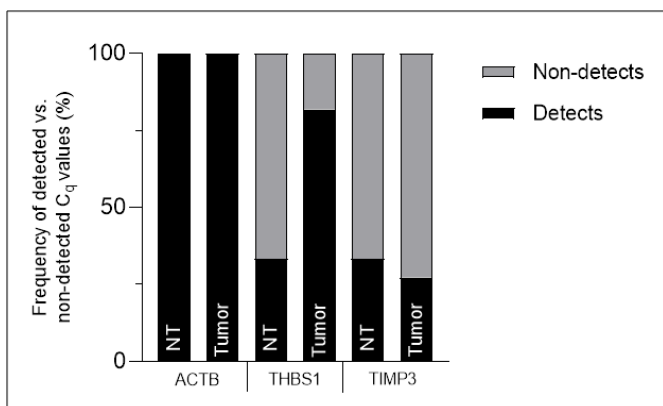

602  
603  
604  
605  
606

**Supplemental figure 2:** Frequency plots of detected vs. non-detected  $C_q$  values in human plasma-derived sEV samples.

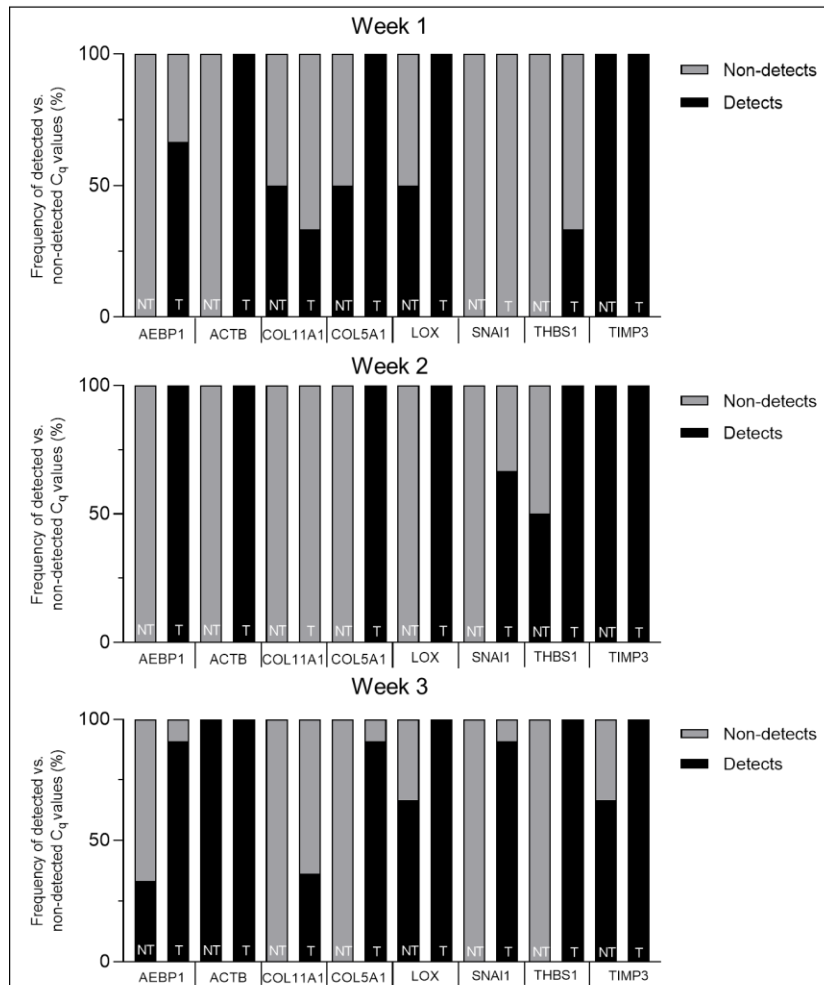

607  
608  
609  
610  
611

**Supplemental figure 3:** Frequency plots of detected vs. non-detected C<sub>q</sub> values in ascites-derived sEV samples.

612 **Supplemental table 1:** TaqMan gene expression assays used for qRT-PCR purchased from Thermo  
613 Fisher.

| Gene Name      | Gene expression assay ID |
|----------------|--------------------------|
| <i>ACTB</i>    | Hs99999903_m1            |
| <i>AEBP1</i>   | Hs00937468_m1            |
| <i>COL5A1</i>  | Hs00609088_m1            |
| <i>COL11A1</i> | Hs01097664_m1            |
| <i>GAPDH</i>   | Hs02786624_g1            |
| <i>LOX</i>     | Hs00942480_m1            |
| <i>NECTIN4</i> | Hs00363974_m1            |
| <i>POSTN</i>   | Hs01566750_m1            |
| <i>SNAI1</i>   | Hs00195591_m1            |
| <i>THBS1</i>   | Hs00962908_m1            |
| <i>TIMP3</i>   | Hs00165949_m1            |

614  
615  
616  
617

**Supplemental table 2:** Datasets used for OvMARK genetic analysis.

| Gene Datasets |                                                                                                                                                                                       |
|---------------|---------------------------------------------------------------------------------------------------------------------------------------------------------------------------------------|
| GSE26712      | <a href="https://www.ncbi.nlm.nih.gov/geo/query/acc.cgi?acc=GSE26712">https://www.ncbi.nlm.nih.gov/geo/query/acc.cgi?acc=GSE26712</a>                                                 |
| GSE13876      | <a href="https://www.ncbi.nlm.nih.gov/geo/query/acc.cgi?acc=GSE13876">https://www.ncbi.nlm.nih.gov/geo/query/acc.cgi?acc=GSE13876</a>                                                 |
| GSE14764      | <a href="https://www.ncbi.nlm.nih.gov/geo/query/acc.cgi?acc=GSE14764">https://www.ncbi.nlm.nih.gov/geo/query/acc.cgi?acc=GSE14764</a>                                                 |
| GSE30161      | <a href="https://www.ncbi.nlm.nih.gov/geo/query/acc.cgi?acc=GSE30161">https://www.ncbi.nlm.nih.gov/geo/query/acc.cgi?acc=GSE30161</a>                                                 |
| GSE19161      | <a href="https://www.ncbi.nlm.nih.gov/geo/query/acc.cgi?acc=GSE19161">https://www.ncbi.nlm.nih.gov/geo/query/acc.cgi?acc=GSE19161</a>                                                 |
| GSE19829      | <a href="https://www.ncbi.nlm.nih.gov/geo/query/acc.cgi?acc=GSE19829">https://www.ncbi.nlm.nih.gov/geo/query/acc.cgi?acc=GSE19829</a>                                                 |
| GSE26193      | <a href="https://www.ncbi.nlm.nih.gov/geo/query/acc.cgi?acc=GSE26193">https://www.ncbi.nlm.nih.gov/geo/query/acc.cgi?acc=GSE26193</a>                                                 |
| GSE18520      | <a href="https://www.ncbi.nlm.nih.gov/geo/query/acc.cgi?acc=GSE18520">https://www.ncbi.nlm.nih.gov/geo/query/acc.cgi?acc=GSE18520</a>                                                 |
| GSE31245      | <a href="https://www.ncbi.nlm.nih.gov/geo/query/acc.cgi?acc=GSE31245">https://www.ncbi.nlm.nih.gov/geo/query/acc.cgi?acc=GSE31245</a>                                                 |
| GSE9899       | <a href="https://www.ncbi.nlm.nih.gov/geo/query/acc.cgi?acc=GSE9899">https://www.ncbi.nlm.nih.gov/geo/query/acc.cgi?acc=GSE9899</a>                                                   |
| GSE17260      | <a href="https://www.ncbi.nlm.nih.gov/geo/query/acc.cgi?acc=GSE17260">https://www.ncbi.nlm.nih.gov/geo/query/acc.cgi?acc=GSE17260</a>                                                 |
| GSE32062      | <a href="https://www.ncbi.nlm.nih.gov/geo/query/acc.cgi?acc=GSE32062">https://www.ncbi.nlm.nih.gov/geo/query/acc.cgi?acc=GSE32062</a>                                                 |
| TCGA          | <a href="https://www.cancer.gov/about-nci/organization/ccg/research/structural-genomics/tcga">https://www.cancer.gov/about-nci/organization/ccg/research/structural-genomics/tcga</a> |

618

619 **Supplemental table 3:** Differential expression of individual genes in the 10-gene panel correlates with  
620 disease-free survival. The OvMark algorithm was used to determine hazard ratios (>1 correlates with poor  
621 outcome, <1 correlates with good outcome-blue) and to show statistical significance between high and  
622 low expression.  
623

|                | Expression   |          |
|----------------|--------------|----------|
|                | Hazard ratio | p value  |
| <i>ACTB</i>    | 1.115        | 0.0356   |
| <i>AEBP1</i>   | 1.238        | 4.09E-5  |
| <i>COL5A1</i>  | 1.229        | 0.00502  |
| <i>COL11A1</i> | 1.276        | 9.19E-4  |
| <i>LOX</i>     | 1.234        | 0.0042   |
| <i>NECTIN4</i> | 1.03         | 0.7211   |
| <i>POSTN</i>   | 1.341        | 1.55E-08 |
| <i>SNAI1</i>   | 0.9676       | 0.657    |
| <i>THBS1</i>   | 1.278        | 8.39E-4  |
| <i>TIMP3</i>   | 1.339        | 1.89E-15 |

624  
625

626 **Supplemental table 4:** Differential expression of individual genes in the 10-gene panel correlates with  
627 disease-free survival in patients with serous ovarian cancer and endometrioid cancer. The OvMark  
628 algorithm was used to determine hazard ratios (>1 correlates with poor outcome, <1 correlates with good  
629 outcome-blue) and to show statistical significance between high and low expression.  
630

|                | Serous       |          | Endometrioid |         |
|----------------|--------------|----------|--------------|---------|
|                | Hazard ratio | p value  | Hazard ratio | p value |
| <i>ACTB</i>    | 1.202        | 0.0430   | 1.095        | 0.893   |
| <i>AEBP1</i>   | 1.254        | 0.00447  | 1.327        | 0.673   |
| <i>COL5A1</i>  | 1.306        | 0.00337  | 1.719        | 0.415   |
| <i>COL11A1</i> | 1.337        | 0.00146  | 1.181        | 0.814   |
| <i>LOX</i>     | 1.279        | 0.000134 | 0.5114       | 0.173   |
| <i>NECTIN4</i> | 1.039        | 0.672    | 4.401        | 0.127   |
| <i>POSTN</i>   | 1.394        | 0.00271  | 1.957        | 0.337   |
| <i>SNAI1</i>   | 1.007        | 0.894    | 1.148        | 0.837   |
| <i>THBS1</i>   | 1.332        | 0.001676 | 0.774        | 0.7172  |
| <i>TIMP3</i>   | 1.399        | 0.000228 | 1.24         | 0.761   |

631  
632

633 **Supplemental table 5:** Differential expression of individual genes in the 10-gene panel correlates with  
634 disease-free survival in various stages of ovarian cancer development. The OvMark algorithm was used to  
635 determine hazard ratios (>1 correlates with poor outcome, <1 correlates with good outcome-blue) and to  
636 show statistical significance (red) between high and low expression.  
637

|                | grade1       |         | grade2       |         | grade3       |         |
|----------------|--------------|---------|--------------|---------|--------------|---------|
|                | Hazard ratio | p value | Hazard ratio | p value | Hazard ratio | p value |
| <i>ACTB</i>    | 1.311        | 0.326   | 1.094        | 0.516   | 1.029        | 0.726   |
| <i>AEBP1</i>   | 1.617        | 0.222   | 1.2          | 0.185   | 1.239        | 0.00891 |
| <i>COL5A1</i>  | 1.365        | 0.421   | 1.151        | 0.307   | 1.280        | 0.0338  |
| <i>COL11A1</i> | 1.815        | 0.116   | 1.163        | 0.273   | 1.388        | 0.0474  |
| <i>LOX</i>     | 1.856        | 0.104   | 1.081        | 0.571   | 1.242        | 0.0626  |
| <i>NECTIN4</i> | 1.089        | 0.824   | 0.9758       | 0.860   | 0.9641       | 0.753   |
| <i>POSTN</i>   | 2.801        | 0.00464 | 1.267        | 0.0843  | 1.433        | 0.00203 |
| <i>SNAI1</i>   | 1.379        | 0.402   | 1.102        | 0.482   | 0.9713       | 0.802   |
| <i>THBS1</i>   | 1.782        | 0.1623  | 1.205        | 0.1747  | 1.272        | 0.03815 |
| <i>TIMP3</i>   | 2.385        | 0.0181  | 1.269        | 0.0823  | 1.279        | 0.0339  |

638  
639



640 **Supplemental table 6:** Patient characteristics.

641

|                                       | <b>Non-<br/>metastatic<br/>(n=6)</b> | <b>Metastatic<br/>(n=5)</b> | <b>Overall<br/>(n=11)</b> |
|---------------------------------------|--------------------------------------|-----------------------------|---------------------------|
| <b>Age, years<br/>(median, range)</b> | 56<br>(50-77)                        | 56.5<br>(38-79)             | 56<br>(38-79)             |
| <b>Histology</b>                      |                                      |                             |                           |
| <b>Papillary serous</b>               | 1                                    | 3                           | 4                         |
| <b>Clear cell</b>                     | 2                                    | 1                           | 3                         |
| <b>Endometrioid</b>                   | 2                                    | 0                           | 1                         |
| <b>Mixed</b>                          | 1                                    | 1                           | 2                         |
| <b>Differentiation</b>                |                                      |                             |                           |
| <b>Well or<br/>moderately</b>         | 5                                    | 1                           | 6                         |
| <b>Poorly</b>                         | 1                                    | 1                           | 2                         |
| <b>Unknown</b>                        | 1                                    | 3                           | 4                         |
| <b>Organ involvement</b>              |                                      |                             |                           |
| <b>Ovary (bilateral)</b>              | 1                                    | 4                           | 5                         |
| <b>Ovary (unilateral)</b>             | 5                                    | 1                           | 6                         |
| <b>Tubal involvement</b>              | 1                                    | 4                           | 5                         |
| <b>Peritoneum</b>                     | 1                                    | 5                           | 6                         |
| <b>Uterus</b>                         | 1                                    | 2                           | 3                         |
| <b>Additional organs</b>              | 0                                    | 1                           | 1                         |

642

643

644

645 **References**

- 646 1. National Cancer Institute: Surveillance E, and End Results Program. Cancer Stat Facts: Ovarian  
647 Cancer. SEER Cancer Statistics: Reports on Cancer2020. p.  
648 <https://seer.cancer.gov/statfacts/html/ovary.html>.
- 649 2. Torre LA, Trabert B, DeSantis CE, Miller KD, Samimi G, Runowicz CD, et al. Ovarian cancer  
650 statistics, 2018. CA: A Cancer Journal for Clinicians. 2018;68(4):284-96.
- 651 3. Halkia E, Spiliotis J, Sugarbaker P. Diagnosis and management of peritoneal metastases from  
652 ovarian cancer. Gastroenterol Res Pract. 2012;2012:541842.
- 653 4. Henderson JT, Webber EM, Sawaya GF. Screening for Ovarian Cancer: Updated Evidence Report  
654 and Systematic Review for the US Preventive Services Task Force. Jama. 2018;319(6):595-606.
- 655 5. Kamal R, Hamed S, Mansour S, Mounir Y, Abdel Sallam S. Ovarian cancer screening-ultrasound;  
656 impact on ovarian cancer mortality. Br J Radiol. 2018;91(1090):20170571.
- 657 6. Mathieu KB, Bedi DG, Thrower SL, Qayyum A, Bast RC, Jr. Screening for ovarian cancer: imaging  
658 challenges and opportunities for improvement. Ultrasound Obstet Gynecol. 2018;51(3):293-303.
- 659 7. Charkhchi P, Cybulski C, Gronwald J, Wong FO, Narod SA, Akbari MR. CA125 and Ovarian Cancer:  
660 A Comprehensive Review. Cancers (Basel). 2020;12(12).

- 661 8. Abu Hassaan SO. Monitoring ovarian cancer patients during chemotherapy and follow-up with  
662 the serum tumor marker CA125. *Dan Med J*. 2018;65(4).
- 663 9. Huang X, Wang Y, He X, Kang F, Luo L, Su Z, et al. Comparison between Serum HE4 and CA125 as  
664 Tumor Markers in Premenopausal Women with Benign Pelvic Mass. *Clin Lab*. 2019;65(5).
- 665 10. Sasamoto N, Babic A, Rosner BA, Fortner RT, Vitonis AF, Yamamoto H, et al. Development and  
666 validation of circulating CA125 prediction models in postmenopausal women. *J Ovarian Res*.  
667 2019;12(1):116.
- 668 11. Dochez V, Caillon H, Vaucel E, Dimet J, Winer N, Ducarme G. Biomarkers and algorithms for  
669 diagnosis of ovarian cancer: CA125, HE4, RMI and ROMA, a review. *J Ovarian Res*. 2019;12(1):28.
- 670 12. Brodsky AS, Fischer A, Miller DH, Vang S, MacLaughlan S, Wu HT, et al. Expression profiling of  
671 primary and metastatic ovarian tumors reveals differences indicative of aggressive disease. *PLoS One*.  
672 2014;9(4):e94476.
- 673 13. Doubeni CA, Doubeni AR, Myers AE. Diagnosis and Management of Ovarian Cancer. *Am Fam*  
674 *Physician*. 2016;93(11):937-44.
- 675 14. Menon U, Karpinskyj C, Gentry-Maharaj A. Ovarian Cancer Prevention and Screening. *Obstet*  
676 *Gynecol*. 2018;131(5):909-27.
- 677 15. Rooth C. Ovarian cancer: risk factors, treatment and management. *Br J Nurs*. 2013;22(17):S23-  
678 30.
- 679 16. Stewart C, Ralyea C, Lockwood S. Ovarian Cancer: An Integrated Review. *Semin Oncol Nurs*.  
680 2019;35(2):151-6.
- 681 17. Cancer Prevention Overview (PDQ(R)): Health Professional Version. PDQ Cancer Information  
682 Summaries. Bethesda (MD)2002.
- 683 18. Schwarzenbach H, Hoon DS, Pantel K. Cell-free nucleic acids as biomarkers in cancer patients.  
684 *Nat Rev Cancer*. 2011;11(6):426-37.
- 685 19. Goodsaid FM. The Labyrinth of Product Development and Regulatory Approvals in Liquid Biopsy  
686 Diagnostics. *Clin Transl Sci*. 2019;12(5):431-9.
- 687 20. Ou SI, Nagasaka M, Zhu VW. Liquid Biopsy to Identify Actionable Genomic Alterations. *Am Soc*  
688 *Clin Oncol Educ Book*. 2018;38:978-97.
- 689 21. Supplee JG, Milan MSD, Lim LP, Potts KT, Sholl LM, Oxnard GR, et al. Sensitivity of next-  
690 generation sequencing assays detecting oncogenic fusions in plasma cell-free DNA. *Lung Cancer*.  
691 2019;134:96-9.
- 692 22. Johann DJ, Jr., Steliga M, Shin IJ, Yoon D, Arnaoutakis K, Hutchins L, et al. Liquid biopsy and its  
693 role in an advanced clinical trial for lung cancer. *Exp Biol Med (Maywood)*. 2018;243(3):262-71.
- 694 23. Ulrich BC, Paweletz CP. Cell-Free DNA in Oncology: Gearing up for Clinic. *Ann Lab Med*.  
695 2018;38(1):1-8.
- 696 24. Kalluri R, LeBleu VS. The biology, function, and biomedical applications of exosomes. *Science*.  
697 2020;367(6478).
- 698 25. Vasconcelos MH, Caires HR, Ābols A, Xavier CPR, Linē A. Extracellular vesicles as a novel source  
699 of biomarkers in liquid biopsies for monitoring cancer progression and drug resistance. *Drug Resist*  
700 *Updat*. 2019;47:100647.
- 701 26. Tutrone R, Donovan MJ, Torkler P, Tadigotla V, McLain T, Noerholm M, et al. Clinical utility of the  
702 exosome based ExoDx Prostate(IntelliScore) EPI test in men presenting for initial Biopsy with a PSA 2-  
703 10 ng/mL. *Prostate Cancer Prostatic Dis*. 2020;23(4):607-14.
- 704 27. Chen X, Gole J, Gore A, He Q, Lu M, Min J, et al. Non-invasive early detection of cancer four  
705 years before conventional diagnosis using a blood test. *Nature communications*. 2020;11(1):1-10.
- 706 28. Cheon DJ, Tong Y, Sim MS, Dering J, Berel D, Cui X, et al. A collagen-remodeling gene signature  
707 regulated by TGF-beta signaling is associated with metastasis and poor survival in serous ovarian cancer.  
708 *Clin Cancer Res*. 2014;20(3):711-23.

- 709 29. Sun Q, Zhao H, Zhang C, Hu T, Wu J, Lin X, et al. Gene co-expression network reveals shared  
710 modules predictive of stage and grade in serous ovarian cancers. *Oncotarget*. 2017;8(26):42983-96.
- 711 30. Li S, Li H, Xu Y, Lv X. Identification of candidate biomarkers for epithelial ovarian cancer  
712 metastasis using microarray data. *Oncol Lett*. 2017;14(4):3967-74.
- 713 31. Matondo A, Jo YH, Shahid M, Choi TG, Nguyen MN, Nguyen NNY, et al. The Prognostic 97  
714 Chemoresponse Gene Signature in Ovarian Cancer. *Sci Rep*. 2017;7(1):9689.
- 715 32. Bekos C, Muqaku B, Dekan S, Horvat R, Polterauer S, Gerner C, et al. NECTIN4 (PVRL4) as  
716 Putative Therapeutic Target for a Specific Subtype of High Grade Serous Ovarian Cancer-An Integrative  
717 Multi-Omics Approach. *Cancers (Basel)*. 2019;11(5).
- 718 33. Liang Y, Lv Z, Huang G, Qin J, Li H, Nong F, et al. Prognostic significance of abnormal matrix  
719 collagen remodeling in colorectal cancer based on histologic and bioinformatics analysis. *Oncol Rep*.  
720 2020;44(4):1671-85.
- 721 34. Sherman-Baust CA, Weeraratna AT, Rangel LB, Pizer ES, Cho KR, Schwartz DR, et al. Remodeling  
722 of the extracellular matrix through overexpression of collagen VI contributes to cisplatin resistance in  
723 ovarian cancer cells. *Cancer Cell*. 2003;3(4):377-86.
- 724 35. Schmittgen TD, Livak KJ. Analyzing real-time PCR data by the comparative C(T) method. *Nat*  
725 *Protoc*. 2008;3(6):1101-8.
- 726 36. Molecular Therapeutics for Cancer IM. OVMARK. In: Madden S, editor.: National Institute For  
727 Cellular Biotechnology, Dublin City University; 2020.
- 728 37. Madden SF, Clarke C, Stordal B, Carey MS, Broaddus R, Gallagher WM, et al. OvMark: a user-  
729 friendly system for the identification of prognostic biomarkers in publically available ovarian cancer gene  
730 expression datasets. *Mol Cancer*. 2014;13:241.
- 731 38. Guo C, Liu S, Wang J, Sun M-Z, Greenaway FT. ACTB in cancer. *Clinica Chimica Acta*.  
732 2013;417:39-44.
- 733 39. Majdalawieh AF, Massri M, Ro HS. AEBP1 is a Novel Oncogene: Mechanisms of Action and  
734 Signaling Pathways. *J Oncol*. 2020;2020:8097872.
- 735 40. Zhang J, Zhang J, Wang F, Xu X, Li X, Guan W, et al. Overexpressed COL5A1 is correlated with  
736 tumor progression, paclitaxel resistance, and tumor-infiltrating immune cells in ovarian cancer. *J Cell*  
737 *Physiol*. 2021:epub ahead of print.
- 738 41. Wu YH, Chang TH, Huang YF, Huang HD, Chou CY. COL11A1 promotes tumor progression and  
739 predicts poor clinical outcome in ovarian cancer. *Oncogene*. 2014;33(26):3432-40.
- 740 42. Natarajan S, Foreman KM, Soriano MI, Rossen NS, Shehade H, Fregoso DR, et al. Collagen  
741 Remodeling in the Hypoxic Tumor-Mesothelial Niche Promotes Ovarian Cancer Metastasis. *Cancer Res*.  
742 2019;79(9):2271-84.
- 743 43. Boylan KL, Buchanan PC, Manion RD, Shukla DM, Braumberger K, Bruggemeyer C, et al. The  
744 expression of Nectin-4 on the surface of ovarian cancer cells alters their ability to adhere, migrate,  
745 aggregate, and proliferate. *Oncotarget*. 2017;8(6):9717-38.
- 746 44. Yue H, Li W, Chen R, Wang J, Lu X, Li J. Stromal POSTN induced by TGF-beta1 facilitates the  
747 migration and invasion of ovarian cancer. *Gynecol Oncol*. 2021;160(2):530-8.
- 748 45. Lu ZY, Dong R, Li D, Li WB, Xu FQ, Geng Y, et al. SNAI1 overexpression induces stemness and  
749 promotes ovarian cancer cell invasion and metastasis. *Oncol Rep*. 2012;27(5):1587-91.
- 750 46. Huang T, Sun L, Yuan X, Qiu H. Thrombospondin-1 is a multifaceted player in tumor progression.  
751 *Oncotarget*. 2017;8(48):84546.
- 752 47. Jackson HW, Hojilla CV, Weiss A, Sanchez OH, Wood GA, Khokha R. Timp3 deficient mice show  
753 resistance to developing breast cancer. *PLoS One*. 2015;10(3):e0120107.
- 754 48. Helwa I, Cai J, Drewry MD, Zimmerman A, Dinkins MB, Khaled ML, et al. A Comparative Study of  
755 Serum Exosome Isolation Using Differential Ultracentrifugation and Three Commercial Reagents. *PLoS*  
756 *One*. 2017;12(1):e0170628.

- 757 49. Théry C, Witwer KW, Aikawa E, Alcaraz MJ, Anderson JD, Andriantsitohaina R, et al. Minimal  
758 information for studies of extracellular vesicles 2018 (MISEV2018): a position statement of the  
759 International Society for Extracellular Vesicles and update of the MISEV2014 guidelines. *J Extracell*  
760 *Vesicles*. 2018;7(1):1535750.
- 761 50. Rao X, Huang X, Zhou Z, Lin X. An improvement of the  $2^{(-\Delta\Delta CT)}$  method for  
762 quantitative real-time polymerase chain reaction data analysis. *Biostat Bioinforma Biomath*.  
763 2013;3(3):71-85.
- 764 51. McCall MN, McMurray HR, Land H, Almudevar A. On non-detects in qPCR data. *Bioinformatics*.  
765 2014;30(16):2310-6.
- 766 52. Cohen M, Petignat P. The bright side of ascites in ovarian cancer. *Cell Cycle*. 2014;13(15):2319.
- 767 53. Palmirotta R, Lovero D, Cafforio P, Felici C, Mannavola F, Pellè E, et al. Liquid biopsy of cancer: a  
768 multimodal diagnostic tool in clinical oncology. *Ther Adv Med Oncol*. 2018;10:1758835918794630.
- 769 54. De Rubis G, Rajeev Krishnan S, Bebawy M. Liquid Biopsies in Cancer Diagnosis, Monitoring, and  
770 Prognosis. *Trends Pharmacol Sci*. 2019;40(3):172-86.
- 771 55. Nogrady B. How cancer genomics is transforming diagnosis and treatment. *Nature*.  
772 2020;579(7800):S10-s1.
- 773 56. Gupta R, Othman T, Chen C, Sandhu J, Ouyang C, Fakhri M. Guardant360 Circulating Tumor DNA  
774 Assay Is Concordant with FoundationOne Next-Generation Sequencing in Detecting Actionable Driver  
775 Mutations in Anti-EGFR Naive Metastatic Colorectal Cancer. *Oncologist*. 2020;25(3):235-43.
- 776 57. Jurj A, Zanoaga O, Braicu C, Lazar V, Tomuleasa C, Irimie A, et al. A Comprehensive Picture of  
777 Extracellular Vesicles and Their Contents. Molecular Transfer to Cancer Cells. *Cancers (Basel)*.  
778 2020;12(2).
- 779 58. Hannafon BN, Trigoso YD, Calloway CL, Zhao YD, Lum DH, Welm AL, et al. Plasma exosome  
780 microRNAs are indicative of breast cancer. *Breast Cancer Res*. 2016;18(1):90.
- 781 59. Rodríguez Zorrilla S, Pérez-Sayans M, Fais S, Logozzi M, Gallas Torreira M, García García A. A  
782 Pilot Clinical Study on the Prognostic Relevance of Plasmatic Exosomes Levels in Oral Squamous Cell  
783 Carcinoma Patients. *Cancers (Basel)*. 2019;11(3).
- 784 60. Kato T, Mizutani K, Kameyama K, Kawakami K, Fujita Y, Nakane K, et al. Serum exosomal P-  
785 glycoprotein is a potential marker to diagnose docetaxel resistance and select a taxoid for patients with  
786 prostate cancer. *Urol Oncol*. 2015;33(9):385.e15-20.
- 787 61. Makler A, Asghar W. Exosomal biomarkers for cancer diagnosis and patient monitoring. *Expert*  
788 *Rev Mol Diagn*. 2020;20(4):387-400.
- 789 62. Avula LR, Hagerty B, Alewine C. Molecular mediators of peritoneal metastasis in pancreatic  
790 cancer. *Cancer Metastasis Rev*. 2020;39(4):1223-43.
- 791 63. Brassart-Pasco S, Brezillon S, Brassart B, Ramont L, Oudart JB, Monboisse JC. Tumor  
792 Microenvironment: Extracellular Matrix Alterations Influence Tumor Progression. *Front Oncol*.  
793 2020;10:397.
- 794 64. Henke E, Nandigama R, Ergün S. Extracellular matrix in the tumor microenvironment and its  
795 impact on cancer therapy. *Frontiers in molecular biosciences*. 2020;6:160.
- 796 65. Winkler J, Abisoye-Ogunniyan A, Metcalf KJ, Werb Z. Concepts of extracellular matrix  
797 remodelling in tumour progression and metastasis. *Nature communications*. 2020;11(1):1-19.
- 798 66. Huang Y-L, Liang C-Y, Ritz D, Coelho R, Septiadi D, Estermann M, et al. Collagen-rich omentum is  
799 a premetastatic niche for integrin  $\alpha 2$ -mediated peritoneal metastasis. *Elife*. 2020;9:e59442.
- 800 67. Alkmin S, Brodziski R, Simon H, Hinton D, Goldsmith RH, Patankar M, et al. Role of Collagen Fiber  
801 Morphology on Ovarian Cancer Cell Migration Using Image-Based Models of the Extracellular Matrix.  
802 *Cancers*. 2020;12(6):1390.

- 803 68. Natarajan S, Foreman KM, Soriano MI, Rossen NS, Shehade H, Fregoso DR, et al. Collagen  
804 remodeling in the hypoxic tumor-mesothelial niche promotes ovarian cancer metastasis. *Cancer*  
805 *research*. 2019;79(9):2271-84.
- 806 69. Derycke MS, Pambuccian SE, Gilks CB, Kalloger SE, Ghidouche A, Lopez M, et al. Nectin 4  
807 overexpression in ovarian cancer tissues and serum: potential role as a serum biomarker. *Am J Clin*  
808 *Pathol*. 2010;134(5):835-45.
- 809 70. Cho A, Howell VM, Colvin EK. The extracellular matrix in epithelial ovarian cancer—a piece of a  
810 puzzle. *Frontiers in oncology*. 2015;5:245.
- 811 71. Xu J, Zhang Z, Chen J, Liu F, Bai L. Overexpression of  $\beta$ -actin is closely associated with metastasis  
812 of gastric cancer. *Hepato-gastroenterology*. 2013;60(123):620-3.
- 813 72. Simiczjew A, Mazur AJ, Dratkiewicz E, Nowak D. Involvement of  $\beta$ - and  $\gamma$ -actin isoforms in actin  
814 cytoskeleton organization and migration abilities of bleb-forming human colon cancer cells. *PloS one*.  
815 2017;12(3):e0173709.
- 816 73. Willms E, Cabañas C, Mäger I, Wood MJ, Vader P. Extracellular vesicle heterogeneity:  
817 subpopulations, isolation techniques, and diverse functions in cancer progression. *Frontiers in*  
818 *immunology*. 2018;9:738.
- 819 74. Willis GR, Kourembanas S, Mitsialis SA. Toward exosome-based therapeutics: isolation,  
820 heterogeneity, and fit-for-purpose potency. *Frontiers in Cardiovascular Medicine*. 2017;4:63.
- 821 75. Yu W, Hurley J, Roberts D, Chakraborty SK, Enderle D, Noerholm M, et al. Exosome-based liquid  
822 biopsies in cancer: opportunities and challenges. *Ann Oncol*. 2021;32(4):466-77.

823
